# Supplementary material
Source: MDPI journal article supplement (https://www.mdpi.com/2673-401X/2/4/23)
Supplement: s1 [file s1]

## Supporting Information

Primary phosphines and phosphine oxides with a stereogenic carbon center adjacent to the phosphorus atom: synthesis and anti-Markovnikov-radical addition to alkenes

Toshiaki Murai,<sup>1</sup> Ryota Wada,<sup>1</sup> Kouji Iwata,<sup>1</sup> Yuuki Maekawa,<sup>1</sup> Kazuma Kuwabara,<sup>1</sup> and Mao Minoura<sup>2</sup>

1 Department of Chemistry and Biomolecular Science, Faculty of Engineering, Gifu University, Yanagido, Gifu 501-1193, Japan

2 Department of Chemistry, Graduate School of Science, Rikkyo University, Nishi-ikebukuro, Toshima-ku, Tokyo, 171-8501, Japan

|                                                       |     |
|-------------------------------------------------------|-----|
| <b>X-ray structure analysis</b>                       | S1  |
| <b>Experimental procedures and spectroscopic data</b> | S3  |
| <b>Cartesian Coordinates</b>                          | S16 |
| <b><sup>1</sup>H and <sup>13</sup>C NMR spectra</b>   | S23 |
| <b>References</b>                                     | S40 |

**X-ray structure analysis:** The single crystals of **7a** suitable for X-ray diffraction were obtained by slow diffusion of hexane into toluene solution of **7a**. Single-crystal X-ray diffraction experiment for **7a** was carried out at the BL02B1 of SPring-8 synchrotron. A wavelength of  $\lambda = 0.41180 \text{ \AA}$  and a single crystal of  $0.005 \times 0.01 \times 0.01 \text{ mm}^3$  were used. The crystal was selected from the grown fine tiny needles and was attached to the tip of a MiTeGen MicroMount<sup>TM</sup>. All frame images (Dectris) were collected at  $-173 \text{ }^\circ\text{C}$  and converted to SFRM format by the *Henkankun-R*<sup>1)</sup>. Data reduction was performed using Bruker SAINT. Structure was solved by direct methods (*SHELXT*)<sup>2)</sup> and refined against  $F^2$  by weighted full-matrix least-squares (*SHELXL*)<sup>3)</sup>. Crystal data and measurement descriptions are summarized Table S1.

**Table S1.** Crystal data and structure refinement for (*S*<sub>ax</sub>, *S*<sub>p</sub>)-**7a**

|                                                                            |                                                                     |
|----------------------------------------------------------------------------|---------------------------------------------------------------------|
| Crystal data                                                               |                                                                     |
| Chemical formula                                                           | C <sub>18</sub> H <sub>31</sub> OPSi                                |
| <i>M</i> <sub>r</sub>                                                      | 322.49                                                              |
| Crystal system, space group                                                | Orthorhombic, <i>P</i> 2 <sub>1</sub> 2 <sub>1</sub> 2 <sub>1</sub> |
| Temperature (K)                                                            | 100                                                                 |
| <i>a</i> , <i>b</i> , <i>c</i> (Å)                                         | 6.4316 (6), 13.8703 (14), 20.916 (2)                                |
| <i>V</i> (Å <sup>3</sup> )                                                 | 1865.9 (3)                                                          |
| <i>Z</i>                                                                   | 4                                                                   |
| Radiation type                                                             | Synchrotron, $\lambda = 0.4119 \text{ \AA}$                         |
| $\mu$ (mm <sup>-1</sup> )                                                  | 0.06                                                                |
| Crystal size (mm)                                                          | 0.01 × 0.01 × 0.01                                                  |
| Data collection                                                            |                                                                     |
| Diffractometer                                                             | Dectris PILATUS-CdTe                                                |
| Absorption correction                                                      | Empirical (using intensity measurements) <i>SADABS</i>              |
| No. of measured, independent and observed [ $I > 2\sigma(I)$ ] reflections | 43417, 4209, 4145                                                   |
| <i>R</i> <sub>int</sub>                                                    | 0.046                                                               |
| ( $\sin \theta/\lambda$ ) <sub>max</sub> (Å <sup>-1</sup> )                | 0.647                                                               |
| Refinement                                                                 |                                                                     |

|                                                             |                                                                                                                                 |
|-------------------------------------------------------------|---------------------------------------------------------------------------------------------------------------------------------|
| $R[F^2 > 2\sigma(F^2)],$<br>$wR(F^2), S$                    | 0.022, 0.062, 1.03                                                                                                              |
| No. of reflections                                          | 4209                                                                                                                            |
| No. of parameters                                           | 199                                                                                                                             |
| H-atom treatment                                            | H atoms treated by a mixture of independent and constrained refinement                                                          |
| $\Delta\rho_{\max}, \Delta\rho_{\min}$ (e Å <sup>-3</sup> ) | 0.25, -0.20                                                                                                                     |
| Absolute structure                                          | Flack x determined using 1756 quotients [(I+)-(I-)]/[(I+)+(I-)]<br>(Parsons, Flack and Wagner, Acta Cryst. B69 (2013) 249-259). |
| Absolute structure<br>parameter                             | 0.05 (6)                                                                                                                        |

## Experimental procedures and spectroscopic data

### (1-Phenylprop-2-yl)phosphane (2a)

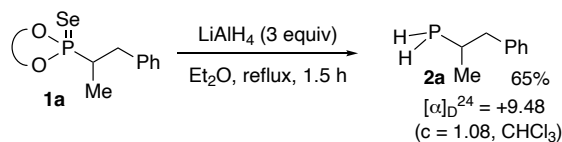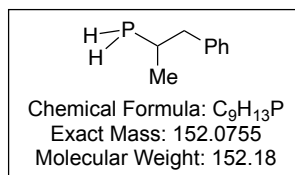

$\text{Et}_2\text{O}$  (5 mL) and (*S*<sub>ax</sub>, *S*)-phosphonoselenoate **1a** (858 mg, 1.7 mmol, dr = 5:95) was placed in a side-arm flask, degassed by *freeze-pump-thaw* cycle. The solution was cooled in ice bath.  $\text{LiAlH}_4$  (228 mg, 6 mmol) was added, and the mixture was stirred at reflux temperature for 1.5 h. The resulting mixture was quenched with water (0.23 mL), sodium hydroxide 15% aqueous solution (0.23 mL) and water (0.7 mL). The solution was filtered through diatomite and washed with sodium hydroxide (5% aqueous solution) five times and hydrochloric acid (1M aqueous solution) two times. The washed solution was dried over  $\text{Na}_2\text{SO}_4$ , filtered, and concentrated to give the primary phosphine **2a** (166 mg, 65%) as a colorless liquid;  $[\alpha]_{\text{D}}^{24} = +9.48$  ( $C = 0.108$ ,  $\text{CHCl}_3$ ); IR (neat):  $2338 \text{ cm}^{-1}$ ;  $^1\text{H}$  NMR ( $\text{CDCl}_3$ ):  $\delta$  1.17 (dd,  $^3J_{\text{P-H}} = 6.9 \text{ Hz}$ ,  $J = 13.1 \text{ Hz}$ , 3H,  $\text{CH}_3$ ), 2.14-2.22 (m, 1H,  $\text{PCH}$ ), 2.66-2.72 (m, 1H,  $\text{CH}_2\text{Ph}$ ), 2.70 (ddd,  $J = 6.4, 12.0 \text{ Hz}$ ,  $^1J_{\text{P-H}} = 194.4 \text{ Hz}$ , 1H,  $\text{PH}_2$ ), 2.72 (ddd,  $J = 5.6, 12.0 \text{ Hz}$ ,  $^1J_{\text{P-H}} = 194.5 \text{ Hz}$ , 1H,  $\text{PH}_2$ ), 2.75-2.81 (m, 1H,  $\text{CH}_2\text{Ph}$ ), 7.14-7.23 (m, 3H), 7.28-7.31 (m, 2H);  $^{13}\text{C}$  NMR ( $\text{CDCl}_3$ ):  $\delta$  22.3 (d,  $^2J_{\text{C-P}} = 9.6 \text{ Hz}$ ), 24.4 (d,  $^2J_{\text{C-P}} = 6.0 \text{ Hz}$ ), 45.6 (d,  $^1J_{\text{C-P}} = 7.2 \text{ Hz}$ ), 126.2, 128.3, 129.0, 140.7 (d,  $^3J_{\text{C-P}} = 6.0 \text{ Hz}$ );  $^{31}\text{P}$  NMR ( $\text{CDCl}_3$ ):  $\delta$  -111.8 (t,  $^1J_{\text{P-H}} = 196.2 \text{ Hz}$ ); MS (EI)  $m/z$  152 ( $\text{M}^+$ ); HRMS Calcd for  $\text{C}_9\text{H}_{13}\text{P}$ : 152.0755, Found: 152.0741.

### (1-Phenyloct-2-yl)phosphane (2b)

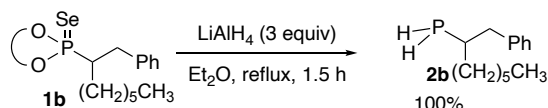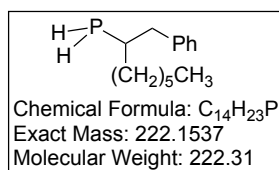

$\text{Et}_2\text{O}$  (3 mL) and (*S*<sub>ax</sub>, *S*)-phosphonoselenoate **1b** (189 mg, 0.33 mmol, dr = 5:95) was placed in a side-arm flask. LAH (57 mg, 1 mmol) was added, and the mixture was stirred at reflux temperature for 1.5 h. The resulting mixture was quenched with water (0.06 mL), sodium hydroxide 15% aqueous solution (0.06 mL) and water (0.18

mL). The solution was filtered through diatomite and washed with sodium hydroxide (5% aqueous solution) five times and hydrochloric acid (1M aqueous solution) two times. The washed solution was dried over Na<sub>2</sub>SO<sub>4</sub>, filtered, and concentrated to give the primary phosphine **2b** (83 mg, 100%) as colorless liquid; IR (neat): 2342 cm<sup>-1</sup>; <sup>1</sup>H NMR (CDCl<sub>3</sub>): δ 0.88 (t, *J* = 7.1 Hz, 3H), 1.22-1.49 (m, 9H), 1.50-1.60 (m, 1H), 2.07-2.12 (m, 1H), 2.59 (ddd, *J* = 6.6, 12.1 Hz, <sup>1</sup>*J*<sub>P-H</sub> = 195.3 Hz, 1H, PH<sub>2</sub>), 2.66 (ddd, *J* = 5.3, 12.0 Hz, <sup>1</sup>*J*<sub>P-H</sub> = 196.1 Hz, 1H, PH<sub>2</sub>), 2.63-2.70 (m, 1H), 2.85-2.92 (m, 1H), 7.14-7.23 (m, 3H), 7.26-7.31 (m, 2H); <sup>13</sup>C NMR (CDCl<sub>3</sub>): δ 14.1, 22.6, 27.8 (d, *J*<sub>C-P</sub> = 6.7 Hz), 29.2, 30.0 (d, *J*<sub>C-P</sub> = 6.7 Hz), 31.7, 36.1 (d, *J*<sub>C-P</sub> = 8.6 Hz), 43.9 (d, *J*<sub>C-P</sub> = 6.7 Hz), 126.1, 128.2, 129.1, 140.6 (d, <sup>3</sup>*J*<sub>C-P</sub> = 4.8 Hz); <sup>31</sup>P NMR (CDCl<sub>3</sub>): δ -123.4 (t, <sup>1</sup>*J*<sub>P-H</sub> = 185.3 Hz)

### (3,3-Dimethyl-1-phenylbut-2-yl)phosphane (2c)

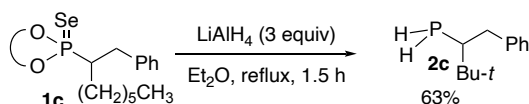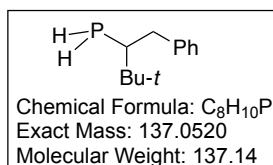

Et<sub>2</sub>O (3 mL) and (*S*<sub>ax</sub>, *S*)- phosphonoselenoate **1d** (135 mg, 0.25 mmol, dr = 72:28) was placed in a side-arm flask. LAH (30 mg, 0.75 mmol) was added, and the mixture was stirred at reflux temperature for 1.5 h. The resulting mixture was quenched with water (0.03 mL), sodium hydroxide 15% aqueous solution (0.03 mL) and water (0.09 mL). The solution was filtered through diatomite and washed with sodium hydroxide (5% aqueous solution) five times and hydrochloric acid (1M aqueous solution) two times. The washed solution was dried over Na<sub>2</sub>SO<sub>4</sub>, filtered, and concentrated to give the primary phosphine **2c** (30 mg, 63%) as colorless liquid; IR (neat): 2344 cm<sup>-1</sup>; <sup>1</sup>H NMR (CDCl<sub>3</sub>): δ 1.10 (s, 9H, C(CH<sub>3</sub>)<sub>3</sub>), 2.02-2.06 (m, 1H, PCH), 2.24-2.33 (m, 1H, CH<sub>2</sub>Ph), 2.26 (ddd, *J* = 6.3, 12.3 Hz, <sup>1</sup>*J*<sub>P-H</sub> = 198.8 Hz, 1H, PH<sub>2</sub>), 2.46 (ddd, *J* = 5.1, 12.2 Hz, <sup>1</sup>*J*<sub>P-H</sub> = 199.1 Hz, 1H, PH<sub>2</sub>), 3.21-3.29 (m, 1H, CH<sub>2</sub>Ph), 7.16-7.23 (m, 3H), 7.27-7.32 (m, 2H); <sup>13</sup>C NMR (CDCl<sub>3</sub>): δ 28.2 (d, <sup>3</sup>*J*<sub>C-P</sub> = 7.5 Hz), 33.6 (d, <sup>2</sup>*J*<sub>C-P</sub> = 9.4 Hz), 38.9 (d, <sup>2</sup>*J*<sub>C-P</sub> = 5.6 Hz), 42.3 (d, <sup>1</sup>*J*<sub>C-P</sub> = 10.3 Hz), 126.0, 128.3, 129.1, 141.8; <sup>31</sup>P NMR (CDCl<sub>3</sub>): δ -145.9 (t, <sup>1</sup>*J*<sub>P-H</sub> = 196.2 Hz)

### (2-Phenyl-1-(trimethylsilyl)ethyl)phosphane (2d)

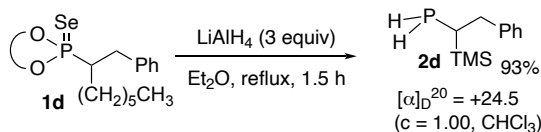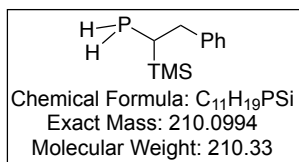

Et<sub>2</sub>O (3 mL) and (*S*<sub>ax</sub>, *S*)- phosphonoselenoate **1e** (284 mg, 0.50 mmol, dr = 90:10) was placed in a side-arm flask. LAH (57 mg, 1.5 mmol) was added, and the mixture was stirred at reflux temperature for 1.5 h. The resulting mixture was quenched with water (0.06 mL), sodium hydroxide 15% aqueous solution (0.06 mL) and water (0.18 mL). The solution was filtered through diatomite and washed with sodium hydroxide (5% aqueous solution) five times and hydrochloric acid (1M aqueous solution) two times. The washed solution was dried over Na<sub>2</sub>SO<sub>4</sub>, filtered, and concentrated to give the primary phosphine **2d** (98 mg, 93%) as colorless liquid; IR (neat): 2342 cm<sup>-1</sup>; <sup>1</sup>H NMR (CDCl<sub>3</sub>): δ 0.10 (s, 9H, Si(CH<sub>3</sub>)<sub>3</sub>), 1.13-1.21 (m, 1H, PCH), 2.47 (ddd, *J* = 7.2, 11.1, 14.0 Hz, 1H, CH<sub>2</sub>Ph), 2.48 (ddd, *J* = 9.8, 11.7 Hz, <sup>1</sup>*J*<sub>P-H</sub> = 195.5 Hz, 1H, PH<sub>2</sub>), 2.61 (ddd, *J* = 5.1, 11.9 Hz, <sup>1</sup>*J*<sub>P-H</sub> = 196.1 Hz, 1H, PH<sub>2</sub>), 3.11-3.20 (m, 1H, CH<sub>2</sub>Ph), 7.16-7.23 (m, 3H), 7.27-7.32 (m, 2H); <sup>13</sup>C NMR (CDCl<sub>3</sub>): δ -2.6 (d, <sup>3</sup>*J*<sub>C-P</sub> = 4.7 Hz), 14.9 (d, <sup>1</sup>*J*<sub>C-P</sub> = 20.7 Hz), 38.7 (d, <sup>2</sup>*J*<sub>C-P</sub> = 4.7 Hz), 126.0, 128.2, 128.8, 141.6 (d, <sup>3</sup>*J*<sub>C-P</sub> = 2.8 Hz); <sup>31</sup>P NMR (CDCl<sub>3</sub>): δ -138.3 (t, <sup>1</sup>*J*<sub>P-H</sub> = 196.2 Hz)

#### (1-Phenyl-2-(trimethylsilyl)prop-2-yl)phosphane (**4**)

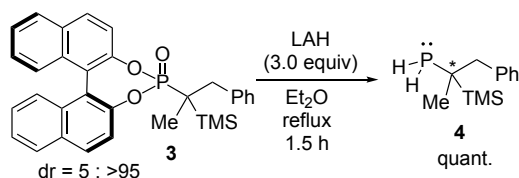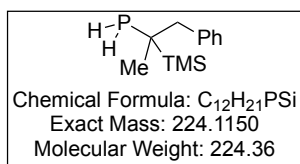

Et<sub>2</sub>O (3 mL) and phosphonate **3** (104 mg, 0.20 mmol) were placed in a 20 mL two-necked flask. LiAlH<sub>4</sub> (23 mg, 0.60 mmol, 3.0 equiv) was added, and the mixture was stirred at reflux temperature for 1.5 h. The resulting mixture was quenched at 0 °C with water (23 μL), sodium hydroxide 15% aqueous solution (23 μL), and water (69 μL). The solution was filtered through diatomite, and washed with sodium hydroxide (5% aqueous solution) five times. The washed solution was dried over MgSO<sub>4</sub>, filtered, and concentrated to give the primary phosphane **4** (44 mg, quant) as a colorless liquid; IR (neat): 2961, 1603, 1494, 1453, 1409, 1261, 1099, 1022 cm<sup>-1</sup>; <sup>1</sup>H NMR(CDCl<sub>3</sub>):

$\delta$  0.11 (s, 9H), 1.16 (d,  $J = 11.2$  Hz, 3H), 2.14-2.38 (m, 1H), 2.64-2.77 (m, 1H), 2.78-2.87 (m, 2H), 7.16-7.25 (m, 3H), 7.29-7.30 (m, 2H);  $^{13}\text{C}$  NMR ( $\text{CDCl}_3$ ):  $\delta$  -3.6, -3.5, 1.4, 17.8 (d,  $J_{\text{P-C1}} = 18.8$  Hz), 24.2 (d,  $J_{\text{P-C2}} = 6.6$  Hz), 43.4 (d,  $J_{\text{P-C3}} = 8.5$  Hz), 126.4, 127.7, 130.8, 137.7 (d,  $J = 3.8$  Hz);  $^{31}\text{P}$  NMR ( $\text{CDCl}_3$ ):  $\delta$  -110.8; MS (EI)  $m/z$  224 ( $\text{M}^+$ ); HRMS Calcd for  $\text{C}_{12}\text{H}_{21}\text{PSi}$ : 224.1150, Found: 224.1159.

### (1-Phenyl-2-(trimethylsilyl)prop-2-yl)phosphine oxide (5)

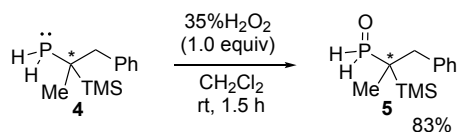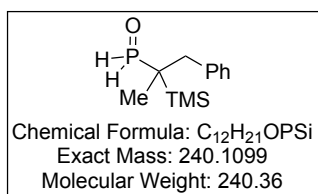

To a 30 mL round-bottom flask were added (1-phenyl-2-(trimethylsilyl)propan-2-yl)phosphane (**4**) (224 mg, 1.0 mmol),  $\text{CH}_2\text{Cl}_2$  (2.0 mL) and hydrogen peroxide (35% aqueous solution, 70  $\mu\text{L}$ , 1.0 mmol, 1.0 equiv), and the mixture was stirred at room temperature for 1.5 h. After that, the mixture was filtered, washed with  $\text{CH}_2\text{Cl}_2$ , and the filtrate was concentrated to give the (1-phenyl-2-(trimethylsilyl)propan-2-yl)phosphine oxide (**5**) (198 mg, 83%) as a colorless solid; mp : 81-83  $^{\circ}\text{C}$ ; IR (KBr): 2922, 2312, 1255, 1179, 1010, 915  $\text{cm}^{-1}$ ;  $^1\text{H}$  NMR( $\text{CDCl}_3$ ):  $\delta$  0.20 (s, 9H), 0.84 (d,  $J = 25.1$  Hz, 3H), 2.71 (dd,  $J = 13.5, 29.6$  Hz, 1H), 3.27 (dd,  $J = 8.1, 13.9$  Hz, 1H), 6.39 (d,  $J_{\text{P-H1}} = 458.7$  Hz, 1H), 6.49 (d,  $J_{\text{P-H2}} = 453.7$  Hz, 1H), 7.18-7.21 (m, 3H), 7.24-7.26 (m, 2H);  $^{13}\text{C}$  NMR ( $\text{CDCl}_3$ ):  $\delta$  -3.3, 1.1, 11.3 (d,  $J_{\text{C-P1}} = 4.7$  Hz), 24.9 (d,  $J_{\text{C-P2}} = 56.4$  Hz), 29.8, 35.8 (d,  $J_{\text{C-P3}} = 2.8\text{Hz}$ ), 127.0, 128.4, 130.7, 134.9 (d,  $J = 5.6$  Hz);  $^{31}\text{P}$  NMR ( $\text{CDCl}_3$ ):  $\delta$  20.0; MS (EI)  $m/z$  240 ( $\text{M}^+$ ); HRMS Calcd for  $\text{C}_{12}\text{H}_{21}\text{OPSi}$ : 240.1099, Found: 240.1080.

### Cyclohexyl(1-phenyl-2-(trimethylsilyl)prop-2-yl)phosphine oxide (7a)

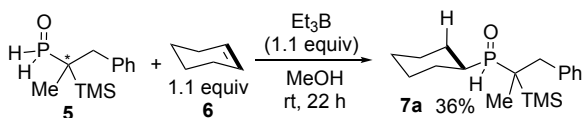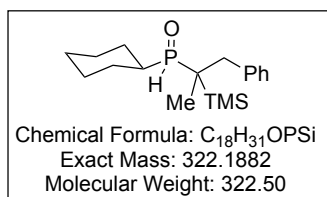

To a solution of (1-phenyl-2-(tmethylsilyl)propan-2-yl)phosphine oxide (**5**) (120 mg, 0.50 mmol) and cyclohexene (56  $\mu\text{L}$ , 0.55 mmol) in methanol (2.5 mL) was added  $\text{Et}_3\text{B}$  (1.0 M, 0.55 mL, 0.55 mmol), at room

temperature in an open reaction vessel. The solution was stirred at room temperature for 22 h. The reaction mixture was concentrated on a rotary evaporator, and the solution was extracted with CH<sub>2</sub>Cl<sub>2</sub> three times, and the combined organic layers were dried and concentrated to afford the crude phosphine oxide. The crude product was purified by column chromatography on Al<sub>2</sub>O<sub>3</sub> (CH<sub>2</sub>Cl<sub>2</sub>:MeOH = 50:1, R<sub>f</sub> = 0.20) to give the mixture (96 mg). The resulting oil was passed through GPC to give **7a** (58 mg, 36%, dr = 95 : 5) as a colorless solid; mp: 85-88 °C; IR (KBr): 2924, 2301, 1453, 1250, 1165, 956, 844, 757 cm<sup>-1</sup>; <sup>1</sup>H NMR(CDCl<sub>3</sub>): δ 0.11 (s, 8.4H), 0.16 (s, 0.6H), 0.98-1.05 (m, 2H), 1.12 (d, *J* = 19.8 Hz, 3H), 1.23-1.28 (m, 4H), 1.48-1.57 (m, 2H), 1.66-1.73 (m, 2H), 1.80-1.81 (m, 1H), 2.72 (dd, *J* = 13.5, 28.7 Hz, 0.06H), 2.90 (dd, *J* = 13.9, 21.3 Hz, 0.94H), 3.17 (dd, *J* = 7.2, 13.5 Hz, 1H), 6.32 (d, *J*<sub>P-H</sub> = 436.2 Hz, 1H), 7.22-7.25 (m, 3H), 7.26-7.27 (m, 2H); <sup>13</sup>C NMR (CDCl<sub>3</sub>): δ -2.6, -2.3, 14.3, 25.8, 26.1, 26.3 (d, *J*<sub>C-P1</sub> = 3.8 Hz), 26.4 (d, *J*<sub>C-P2</sub> = 3.8 Hz), 29.1 (d, *J*<sub>C-P3</sub> = 48.9 Hz), 29.8, 33.6 (d, *J*<sub>C-P4</sub> = 59.4 Hz), 35.9 (d, *J*<sub>C-P5</sub> = 2.9 Hz), 38.1, 126.8, 128.2, 130.8, 137.7 (d, *J* = 7.7 Hz); <sup>31</sup>P NMR (CDCl<sub>3</sub>): δ 54.0 (major), 55.8 (minor); MS (EI) *m/z* 322 (M<sup>+</sup>); HRMS Calcd for C<sub>18</sub>H<sub>31</sub>OPSi: 322.1882, Found: 322.1860.

## (2- Hydroxypropyl)(1-phenyl-2-(trimethylsilyl)prop-2-yl)phosphine oxide (**7b**)

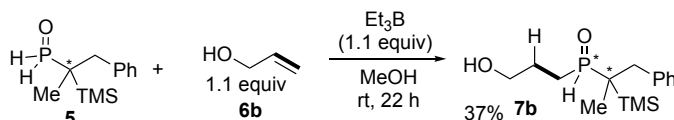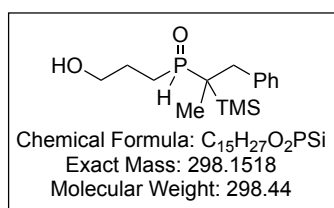

To a solution of (1-phenyl-2-(trimethylsilyl)propan-2-yl)phosphine oxide (**5**) (120 mg, 0.50 mmol) and allyl alcohol (37 μl, 0.55 mmol) in methanol (2.5 mL) was added Et<sub>3</sub>B (1.0 M, 0.55 mL, 0.55 mmol) at room temperature in an open reaction vessel. The solution was stirred at room temperature for 22 h. The reaction mixture was concentrated on a rotary evaporator, and the solution was extracted with CH<sub>2</sub>Cl<sub>2</sub> three times, and the combined organic layers were dried and concentrated to afford the crude phosphine oxide. The crude product was purified by column chromatography on Al<sub>2</sub>O<sub>3</sub> (CH<sub>2</sub>Cl<sub>2</sub>:MeOH = 50:1, R<sub>f</sub> = 0.20) to give the mixture (98 mg). The resulting oil was passed through GPC to give **7b** (55 mg, 37%, dr = 81:19) as a colorless oil; IR (neat): 3343, 2925, 1454, 1252, 1164, 962, 843, 761 cm<sup>-1</sup>; <sup>1</sup>H NMR(CDCl<sub>3</sub>): δ 0.13 (s, 6.9H), 0.20 (s, 2.1H), 1.09 (d, *J* = 20.6 Hz, 3H), 1.21-1.43



(m, 2H), 1.79-1.81 (m, 2H), 2.83 (dd,  $J = 13.5, 22.9$  Hz, 1H), 3.13-3.18 (m, 1H), 3.55 (br, 2H), 4.64 (br, 1H), 6.50 (d,  $J_{\text{P-H}} = 383.3$  Hz, 1H), 7.17-7.22 (m, 2H), 7.24-7.25 (m, 3H);  $^{13}\text{C}$  NMR ( $\text{CDCl}_3$ ):  $\delta$  -2.6, -2.2, 14.1, 14.5, 21.9 (d,  $J_{\text{P-C1}} = 60.4$  Hz), 27.0 (d,  $J_{\text{P-C2}} = 14.4$  Hz), 35.7, 37.7, 62.7, 127.0, 128.3, 131.1, 137.2 (d,  $J = 6.7$  Hz);  $^{31}\text{P}$  NMR ( $\text{CDCl}_3$ ):  $\delta$  48.7 (major), 50.8 (minor); MS (EI)  $m/z$  298 ( $\text{M}^+$ ); HRMS Calcd for  $\text{C}_{15}\text{H}_{27}\text{O}_2\text{PSi}$ : 298.1518, Found: 298.1505.

**(1-Phenyl-2-(trimethylsilyl)prop-2-yl)(3-(trimethylsilyl)propyl)phosphine oxide (7c)**

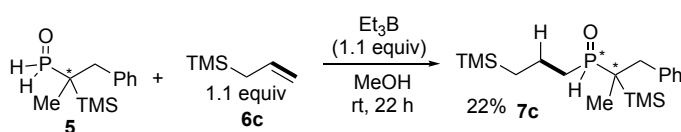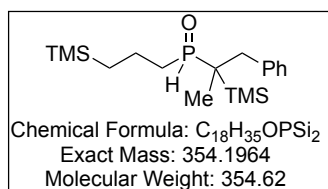

To a solution of (1-phenyl-2-(trimethylsilyl)prop-2-yl)phosphine oxide (**5**) (120 mg, 0.50 mmol) and allyltrimethylsilane (85  $\mu\text{L}$ , 0.55 mmol) in methanol (2.5 mL) was added  $\text{Et}_3\text{B}$  in hexane (0.6 M, 1.1 mL, 0.65 mmol) at room temperature in an open reaction vessel. The solution was stirred at room temperature for 22 h. The reaction mixture was concentrated on a rotary evaporator, and the solution was extracted with  $\text{CH}_2\text{Cl}_2$  three times, and the combined organic layers were dried and concentrated to afford the crude phosphine oxide. The crude product was purified by column chromatography on  $\text{Al}_2\text{O}_3$  ( $\text{CH}_2\text{Cl}_2$ : $\text{MeOH} = 50 : 1$ ,  $R_f = 0.20$ ) to give the mixture (111 mg). The resulting solid was passed through GPC to give **7c** (39 mg, 22%, dr = 7:22) as a colorless oil; IR (neat): 3369, 3029, 2953, 2309, 1603, 1455, 1174, 840  $\text{cm}^{-1}$ ;  $^1\text{H}$  NMR( $\text{CDCl}_3$ ):  $\delta$  -0.07 (s, 9H), 0.14 (s, 9H), 0.44-0.52 (m, 1H), 0.55-0.88 (m, 1H), 1.08 (d,  $J = 20.6$  Hz, 3H), 1.15-1.47 (m, 3H), 1.62-1.75 (m, 1H), 2.71 (dd,  $J = 13.9, 29.2$  Hz, 0.27H), 2.87 (dd,  $J = 13.9, 22.4$  Hz, 0.73H), 3.15 (dd,  $J = 7.6, 13.9$  Hz, 0.73H), 3.27 (dd,  $J = 7.6, 13.9$  Hz, 0.27H), 6.57 (d,  $J_{\text{P-H}} = 453.3$  Hz, 1H), 7.21-7.23 (m, 2H), 7.27-7.37 (m, 3H);  $^{13}\text{C}$  NMR ( $\text{CDCl}_3$ ):  $\delta$  -2.7, -2.6, -2.2, -1.7, -0.7, -0.5, 14.1, 14.5, 18.4, 28.2 (d,  $J_{\text{P-C1}} = 58.2$  Hz), 35.7 (d,  $J_{\text{P-C2}} = 16.0$  Hz), 37.7, 126.9, 128.2, 131.0, 137.5 (d,  $J = 7.5$  Hz);  $^{31}\text{P}$  NMR ( $\text{CDCl}_3$ ):  $\delta$  46.2 (major), 47.8 (minor); MS (EI)  $m/z$  354 ( $\text{M}^+$ ); HRMS Calcd for  $\text{C}_{18}\text{H}_{35}\text{OPSi}_2$ : 354.1964, Found: 354.1964.

**6-((1-Phenyl-2-(trimethylsilyl)prop-2-yl)hydrophosphoryl)hexan-2-one (7d)**

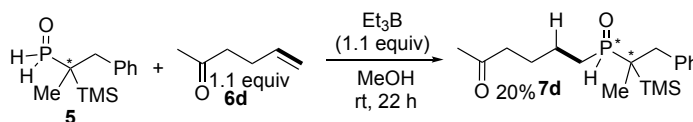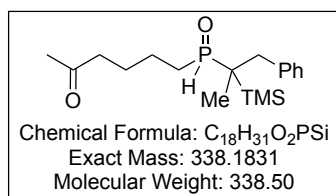

To a solution of (1-phenyl-2-(trimethylsilyl)propan-2-yl)phosphine oxide (**5**) (120 mg, 0.50 mmol) and 5-hexen-2-one (64  $\mu$ L, 0.55 mmol) in methanol (2.5 mL) was added Et<sub>3</sub>B in hexane (1.0 M, 0.55 mL, 0.55 mmol) at room temperature in an open reaction vessel. The solution was stirred at room temperature for 22 h. The reaction mixture was concentrated on a rotary evaporator, and the solution was extracted with CH<sub>2</sub>Cl<sub>2</sub> three times, and the combined organic layers were dried and concentrated to afford the crude phosphine oxide. The crude product was purified by column chromatography on Al<sub>2</sub>O<sub>3</sub> (CH<sub>2</sub>Cl<sub>2</sub>:MeOH = 50:1, R<sub>f</sub> = 0.20) to give the mixture (120 mg). The resulting oil was passed through GPC to give **7d** (34 mg, 20%, dr = 81:19) as a colorless oil; IR (neat): 2953, 2309, 1714, 1455, 1360, 1252, 1171 cm<sup>-1</sup>; <sup>1</sup>H NMR(CDCl<sub>3</sub>):  $\delta$  0.14 (s, 7.4H), 0.21 (s, 1.6H), 1.07 (d,  $J$  = 20.6 Hz, 2.3H), 1.08 (d,  $J$  = 18.9 Hz, 0.7H), 1.12-1.27 (m, 2H), 1.40-1.64 (m, 4H), 2.08 (s, 3H), 2.35 (t,  $J$  = 7.0 Hz, 2H), 2.71 (dd,  $J$  = 13.5, 30.0 Hz, 0.29H), 2.83 (dd,  $J$  = 13.5, 23.1 Hz, 0.71H), 3.17 (dd,  $J$  = 7.6, 13.7 Hz, 0.75H), 3.24 (dd,  $J$  = 7.6, 13.9 Hz, 0.25H), 6.45 (d,  $J_{P-H}$  = 441.6 Hz, 0.22H), 6.56 (d,  $J_{P-H}$  = 438.0 Hz, 0.78H), 7.19-7.23 (m, 2H), 7.25-7.30 (m, 3H); <sup>13</sup>C NMR (CDCl<sub>3</sub>):  $\delta$  -2.7, -2.3, 14.3, 23.0 (d,  $J_{P-C1}$  = 3.8 Hz), 24.3 (d,  $J_{P-C2}$  = 53.6 Hz), 24.6 (d,  $J_{P-C3}$  = 6.6 Hz), 25.7 (d,  $J_{P-C4}$  = 62.0 Hz), 27.7 (d,  $J_{P-C5}$  = 52.6 Hz), 30.0, 35.7, 43.2, 126.9, 128.2, 131.1, 137.4 (d,  $J$  = 7.5 Hz), 208.5; <sup>31</sup>P NMR (CDCl<sub>3</sub>):  $\delta$  45.6 (major), 47.6 (minor); MS (EI)  $m/z$  338 (M<sup>+</sup>); HRMS Calcd for C<sub>18</sub>H<sub>31</sub>O<sub>2</sub>PSi: 338.1831, Found: 338.1803.

### 3-((1-Phenyl-2-(trimethylsilyl)prop-2-yl)hydrophosphoryl)propyl acetate (**7e**)

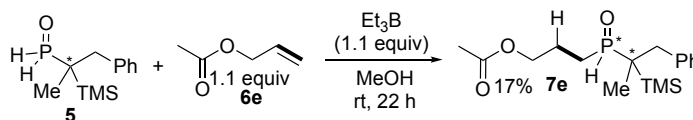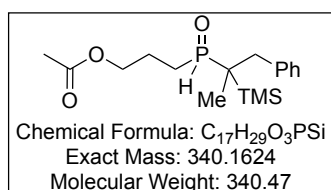

To a solution of (1-phenyl-2-(trimethylsilyl)propan-2-yl)phosphine oxide (**5**) (120 mg, 0.50 mmol) and allyl acetate (60  $\mu$ L, 0.55 mmol) in methanol (2.5 mL) was added Et<sub>3</sub>B in hexane (1.0 M, 0.55 mL, 0.55 mmol) at room

temperature in an open reaction vessel. The solution was stirred at room temperature for 22 h. The reaction mixture was concentrated on a rotary evaporator, and the solution was extracted with CH<sub>2</sub>Cl<sub>2</sub> three times, and the combined organic layers were dried and concentrated to afford the crude phosphine oxide. The crude product was purified by column chromatography on Al<sub>2</sub>O<sub>3</sub> (CH<sub>2</sub>Cl<sub>2</sub> : MeOH = 50 : 1, R<sub>f</sub> = 0.20) to give the mixture (105 mg). The resulting oil was passed through GPC to give **7e** (29 mg, 17%, dr = 79 : 21) as a colorless oil; IR (neat): 2956, 2310, 1739, 1455, 1365, 1241, 1178, 1036 cm<sup>-1</sup>; <sup>1</sup>H NMR(CDCl<sub>3</sub>): δ 0.15 (s, 7.2H), 0.22 (s, 1.8H), 1.08 (d, *J* = 20.6 Hz, 2.4H), 1.10 (d, *J* = 18.9 Hz, 0.6H), 1.15-1.41 (m, 2H), 1.68-1.78 (m, 1H), 1.97 (s, 0.7H), 1.98 (s, 2.3H), 2.01-2.06 (m, 1H), 2.82 (dd, *J* = 13.9, 24.2 Hz, 1H), 3.20 (dd, *J* = 7.2, 13.7 Hz, 1H), 3.91-4.02 (m, 2H), 6.51 (d, *J*<sub>P-H</sub> = 443.4 Hz, 0.2H), 6.60 (d, *J*<sub>P-H</sub> = 439.4 Hz, 0.8H), 7.18-7.23 (m, 2H), 7.26-7.29 (m, 3H); <sup>13</sup>C NMR (CDCl<sub>3</sub>): δ -2.7, -2.3, 14.2, 21.0, 21.5, 22.7 (d, *J*<sub>P-C1</sub> = 2.8 Hz), 22.9 (d, *J*<sub>P-C2</sub> = 5.6 Hz), 27.7 (d, *J*<sub>P-C3</sub> = 53.4 Hz), 35.7, 64.3 (d, *J*<sub>P-C4</sub> = 14.1 Hz), 126.9, 128.3, 131.1, 137.3 (d, *J* = 6.6 Hz), 171.0; <sup>31</sup>P NMR (CDCl<sub>3</sub>): δ 44.8 (major), 47.1 (minor); MS (EI) *m/z* 340 (M<sup>+</sup>); HRMS Calcd for C<sub>17</sub>H<sub>29</sub>O<sub>3</sub>PSi: 340.1624, Found: 340.1616.

**(1)-Phenyl-2-(trimethylsilyl)prop-2-yl(3-(((3*aR*,5*R*,5*aS*,8*aS*,8*bR*)-2,2,7,7-tetramethyltetrahydro-5H-bis([1,3]dioxolo)[4,5-*b*:4',5'-*d*]pyran-5-yl)methoxy)propyl)phosphine oxide (**7f**)**

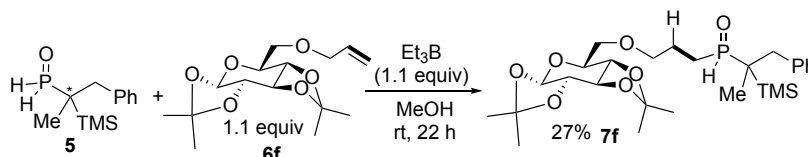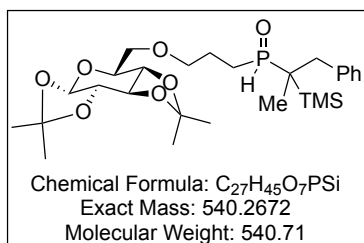

To a solution of (1-phenyl-2-(trimethylsilyl)propan-2-yl)phosphine oxide (**5**) (120 mg, 0.50 mmol) and (3*aR*,5*R*,5*aS*,8*aS*,8*bR*)-5-((allyloxy)methyl)-2,2,7,7-tetramethyltetrahydro-5H-bis([1,3]dioxolo)[4,5-*b*:4',5'-*d*]pyran (165 mg, 0.55 mmol) in methanol (2.5 mL) was added Et<sub>3</sub>B in THF (1.0 M, 0.55 mL, 0.55 mmol) at room

temperature in an open reaction vessel. After 22 h, To the reaction mixture was added Et<sub>3</sub>B in THF (1.0 M, 0.55 mL, 0.55 mmol). The solution was stirred at room temperature for 48 h. The reaction mixture was concentrated on a rotary evaporator, and the solution was extracted with CH<sub>2</sub>Cl<sub>2</sub> three times, and the combined organic layers were dried and

concentrated to afford the crude phosphine oxide. The resulting oil was passed through column chromatography on Al<sub>2</sub>O<sub>3</sub> (CH<sub>2</sub>Cl<sub>2</sub>:MeOH = 50:1) to give the mixture (201 mg). The resulting oil was passed through GPC to give **7f** (72 mg, 27%, dr = 85 : 15) as a colorless oil; IR (neat): 2934, 1719, 1456, 1380, 1254, 1212, 1169, 1070 cm<sup>-1</sup>; <sup>1</sup>H NMR(CDCl<sub>3</sub>): δ 0.11 (s, 7.4H), 0.19 (s, 1.6H), 1.05 (d, *J* = 19.3 Hz, 0.6H), 1.07 (d, *J* = 20.6 Hz, 2.4H), 1.18-1.32 (m, 8H), 1.39 (br, 4H), 1.47 (s, 3H), 1.63-1.95 (m, 1H), 2.87 (dd, *J* = 13.5, 21.8 Hz, 1H), 3.12 (dd, *J* = 8.1, 13.7 Hz, 1H), 3.32-3.45 (m, 1H), 3.49-3.60 (m, 3H), 3.85-3.91 (m, 1H), 4.15-4.17 (m, 1H), 4.25-4.27 (m, 1H), 4.43-4.56 (m, 1H), 5.47 (d, *J* = 4.9 Hz, 1H), 6.44 (d, *J*<sub>P-H</sub> = 444.8 Hz, 0.2H), 6.58 (d, *J*<sub>P-H</sub> = 440.7 Hz, 0.8H), 7.20-7.21 (m, 2H), 7.23-7.29 (m, 3H); <sup>13</sup>C NMR (CDCl<sub>3</sub>): δ -2.6, -2.2, 14.1, 14.4, 21.1 (d, *J*<sub>P-C1</sub> = 61.1 Hz), 23.5, 23.6, 24.5, 25.0, 26.1 (d, *J*<sub>P-C2</sub> = 12.2 Hz), 27.7 (d, *J*<sub>P-C3</sub> = 51.7 Hz), 35.7, 37.6, 66.8, 69.5, 70.6 (d, *J*<sub>P-C4</sub> = 11.3 Hz), 71.0 (d, *J*<sub>P-C5</sub> = 13.2 Hz), 71.2, 96.4, 108.6, 109.3, 126.9, 127.9, 128.2, 130.8, 131.0, 137.4 (d, *J* = 8.5 Hz); <sup>31</sup>P NMR (CDCl<sub>3</sub>): δ 46.5 (major), 48.1 (minor); MS (EI) *m/z* 540 (M<sup>+</sup>); HRMS Calcd for C<sub>27</sub>H<sub>45</sub>O<sub>7</sub>PSi: 540.2672, Found: 540.2655.

#### (6-Bromohexyl)(1-phenyl-2-(trimethylsilyl)prop-2-yl)phosphine oxide (**7g**)

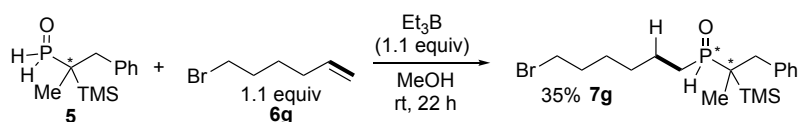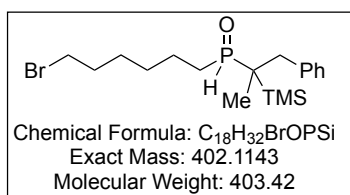

To a solution of (1-phenyl-2-(trimethylsilyl)propan-2-yl)phosphine oxide (**5**) (120 mg, 0.50 mmol) and 6-bromo-1-hexene (80 μL, 0.55 mmol) in methanol (2.5 mL) was added Et<sub>3</sub>B in THF (1.0 M, 0.55 mL, 0.55 mmol) at room temperature in an open reaction vessel. After 10 h, the solution was added Et<sub>3</sub>B in THF (1.0 M, 0.55 mL, 0.55 mmol). The solution was stirred at room temperature for 22 h. The reaction mixture was concentrated on a rotary evaporator, and the solution was extracted with CH<sub>2</sub>Cl<sub>2</sub> three times, and the combined organic layers were dried and concentrated to afford the crude phosphine oxide. The crude product was purified by column chromatography on Al<sub>2</sub>O<sub>3</sub> (CH<sub>2</sub>Cl<sub>2</sub>:MeOH = 50:1, R<sub>f</sub> = 0.20) to give the mixture (100 mg). The resulting solid was passed through GPC to give **7g** (71 mg, 35%, dr = 83:17) as a colorless oil; IR (neat): 2934, 2309, 1495, 1455, 1251, 1173 cm<sup>-1</sup>; <sup>1</sup>H NMR(CDCl<sub>3</sub>): δ 0.12 (s, 7.5H), 0.20 (s, 1.5H), 1.06 (d, *J* = 20.2 Hz, 3H), 1.11-1.22 (m, 2H), 1.26-1.43 (m,

5H), 1.63-1.80 (m, 3H), 2.82 (dd,  $J = 13.5, 23.1$  Hz, 1H), 3.15 (dd,  $J = 7.2, 13.7$  Hz, 1H), 3.32 (t,  $J = 6.7$  Hz, 2H), 6.44 (d,  $J_{\text{P-H}} = 441.2$  Hz, 0.25H), 6.54 (d,  $J_{\text{P-H}} = 437.1$  Hz, 0.75H), 7.18-7.20 (m, 2H), 7.24-7.28 (m, 3H);  $^{13}\text{C}$  NMR ( $\text{CDCl}_3$ ):  $\delta$  -2.7, -2.2, 14.0, 14.4, 23.2 (d,  $J_{\text{P-C1}} = 3.8$  Hz), 24.2 (d,  $J_{\text{P-C2}} = 60.1$  Hz), 27.6, 27.7 (d,  $J_{\text{P-C3}} = 52.6$  Hz), 29.7 (d,  $J_{\text{P-C4}} = 12.2$  Hz), 33.1 (d,  $J_{\text{P-C5}} = 139.1$  Hz), 35.7, 37.7, 126.9, 127.9, 128.2, 130.7, 131.0, 137.4 (d,  $J = 7.5$  Hz);  $^{31}\text{P}$  NMR ( $\text{CDCl}_3$ ):  $\delta$  46.2 (major), 48.1 (minor); MS (EI)  $m/z$  402 ( $\text{M}^+$ ); HRMS Calcd for  $\text{C}_{18}\text{H}_{32}\text{BrOPSi}$ : 402.1143, Found: 402.1136.

### Hex-5-en-1-yl(1-phenyl-2-(trimethylsilyl)prop-2-yl)phosphine oxide (7h)

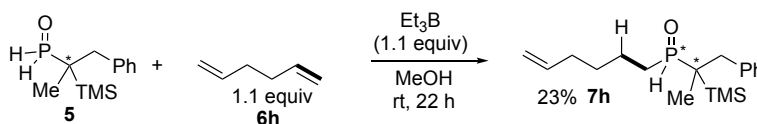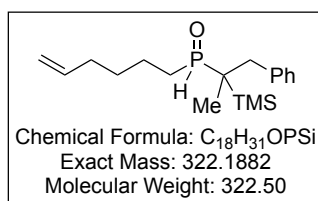

To a solution of (1-phenyl-2-(trimethylsilyl)propan-2-yl)phosphine oxide (**5**) (120 mg, 0.50 mmol) and 1,5-hexadiene (66  $\mu\text{L}$ , 0.55 mmol) in methanol (2.5 mL) was added  $\text{Et}_3\text{B}$  in hexane (0.6 M, 0.92 mL, 0.55 mmol) at room temperature in an open reaction vessel. The solution was stirred at room temperature for 22 h. The reaction mixture was concentrated on a rotary evaporator, and the solution was extracted with  $\text{CH}_2\text{Cl}_2$  three times, and the combined organic layers were dried and concentrated to afford the crude phosphine oxide. The crude product was purified by column chromatography on  $\text{Al}_2\text{O}_3$  ( $\text{CH}_2\text{Cl}_2$ :MeOH = 50:1,  $R_f$  = 0.20) to give the mixture (120 mg). The resulting oil was passed through GPC to give **7h** (37 mg, 23%, dr = 81 : 19) as a colorless oil; IR (neat): 2927, 2305, 1639, 1454, 1252, 1177  $\text{cm}^{-1}$ ;  $^1\text{H}$  NMR( $\text{CDCl}_3$ ):  $\delta$  0.14 (s, 7.2H), 0.22 (s, 1.8H), 0.75-0.85 (m, 1H), 1.08 (d,  $J = 20.6$  Hz, 3H), 1.16-1.24 (m, 2H), 1.36-1.40 (m, 2H), 1.65-1.70 (m, 1H), 1.96-1.98 (m, 2H), 2.85 (dd,  $J = 13.5, 22.9$  Hz, 1H), 3.18 (dd,  $J = 7.6, 13.9$  Hz, 1H), 4.90-4.97 (m, 2H), 5.67-5.77 (m, 1H), 6.46 (d,  $J_{\text{P-H}} = 441.6$  Hz, 0.24H), 6.57 (d,  $J_{\text{P-H}} = 438.0$  Hz, 0.76H), 7.23-7.25 (m, 2H), 7.26-7.29 (m, 3H);  $^{13}\text{C}$  NMR ( $\text{CDCl}_3$ ):  $\delta$  -2.7, -2.2, 14.4, 22.9 (d,  $J_{\text{P-C1}} = 3.8$  Hz), 24.3 (d,  $J_{\text{P-C2}} = 59.2$  Hz), 27.7 (d,  $J_{\text{P-C3}} = 52.6$  Hz), 29.9 (d,  $J_{\text{P-C4}} = 13.2$  Hz), 33.3, 35.8, 37.7, 114.9, 126.9, 128.2, 131.1, 137.5 (d,  $J = 7.5$  Hz), 138.3;  $^{31}\text{P}$  NMR ( $\text{CDCl}_3$ ):  $\delta$  46.5 (major), 48.1 (minor); MS (EI)  $m/z$  322 ( $\text{M}^+$ ); HRMS Calcd for  $\text{C}_{18}\text{H}_{31}\text{OPSi}$ : 322.1882, Found: 322.1879.

## 2-(Dimethyl(phenyl)silyl)phospholane-Borane (**13a**)

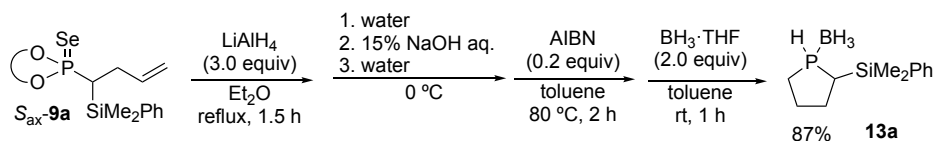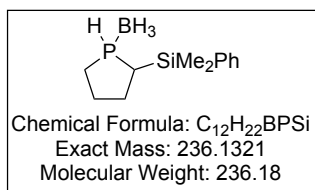

Et<sub>2</sub>O (5 mL) and phosphonoselenoate **9a** (292 mg, 0.5 mmol) was placed in a 20 mL two-necked flask. LAH (57 mg, 1.5 mmol, 3.0 equiv) was added, and the mixture was stirred at reflux temperature for 1.5 h. The resulting mixture was quenched with water (60  $\mu$ L), sodium hydroxide 15% aqueous solution (60  $\mu$ L), and water (180  $\mu$ L). The solution was filtered through diatomite, and concentrated to give the primary phosphine as a colorless oil. This oil and toluene (5 mL) were placed in a 20 mL two-necked flask. To this AIBN (16 mg, 0.1 mmol, 0.2 equiv) was added, and the mixture was stirred at 80 °C for 2 h. The reaction mixture was cooled to room temperature. BH<sub>3</sub>·THF (1.0 M THF solution, 1 mL, 1.0 mmol, 2.0 equiv) was then added to the solution, and it was stirred for 1 h. To the resulting solution were added water and ether. The aqueous phase was extracted with ether three times. The combined organic layer was dried over MgSO<sub>4</sub>, filtered, and concentrated. The crude product was purified by column chromatography on silica gel (CH<sub>2</sub>Cl<sub>2</sub>:hexane = 1:3, R<sub>f</sub> = 0.3) to give the product **13a** (103 mg, 87%, dr = 88:12) as a colorless oil; IR (neat): 3069, 2952, 2380, 2245, 1487, 1427, 1305, 1253, 1059, 924, 834, 771, 735, 620, 472 cm<sup>-1</sup>; <sup>1</sup>H NMR (CDCl<sub>3</sub>):  $\delta$  0.46 (s, 2.7H), 0.46 (s, 2.7H), 0.50 (s, 0.3H), 0.53 (s, 0.3H), 0.65 (br, 3H), 1.25-1.35 (m, 1H), 1.50-1.59 (m, 1H), 1.61-1.70 (m, 1H), 1.78-1.84 (m, 1H), 1.88-1.99 (m, 2H), 2.07-2.19 (m, 1H), 4.50 (ddt,  $J$  = 348.5 Hz, 17.2 Hz, 6.3 Hz, 0.45H), 4.48-4.52 (m, 0.05H), 5.39-5.42 (m, 0.05H), 7.36-7.42 (m, 3H), 7.52-7.55 (m, 2H); <sup>13</sup>C NMR (CDCl<sub>3</sub>):  $\delta$  -4.3, -3.0, 21.2 (d,  $J$  = 35.7 Hz), 22.1 (d,  $J$  = 23.5 Hz), 27.8, 31.2, 128.0, 129.7, 133.9, 135.7; <sup>31</sup>P NMR (CDCl<sub>3</sub>):  $\delta$  1.6 (minor), 3.7 (major) ( $J$  = 55.1 Hz); <sup>11</sup>B NMR (CDCl<sub>3</sub>):  $\delta$  -42.3; MS (EI)  $m/z$  236 (M<sup>+</sup>); HRMS Calcd for C<sub>12</sub>H<sub>22</sub>BPSi: 236.1321, Found: 236.1316.

## 2-(Dimethyl(phenyl)silyl)-2-methylphospholane-Borane (**13b**)

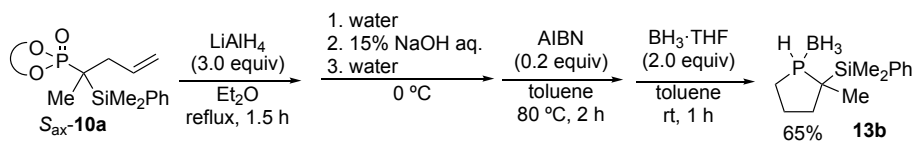

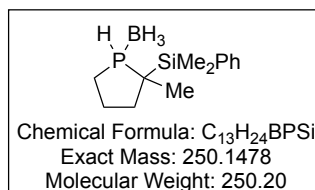

Et<sub>2</sub>O (3 mL) and phosphonoselenoate **10a** (80 mg, 0.15 mmol) was placed in a 20 mL two-necked flask. LAH (17 mg, 0.45 mmol, 3.0 equiv) was added, and the mixture was stirred at reflux temperature for 1.5 h. The resulting mixture was quenched with water (20 μL), sodium hydroxide 15% aqueous solution (20 μL), and water (60 μL). The solution was filtered through diatomite, and concentrated to give the primary phosphine as a colorless oil. This oil and toluene (5 mL) were placed in a 20 mL two-necked flask. To this AIBN (5 mg, 0.03 mmol, 0.2 equiv) was added, and the mixture was stirred at 80 °C for 2 h. The reaction mixture was cooled to room temperature. BH<sub>3</sub>·THF (1.0 M THF solution, 0.3 mL, 0.3 mmol, 2.0 equiv) was then added to the solution, and it was stirred for 1 h. To the resulting solution were added water and ether. The aqueous phase was extracted with ether three times. The combined organic layer was dried over MgSO<sub>4</sub>, filtered, and concentrated. The crude product was purified by column chromatography on silica gel (CH<sub>2</sub>Cl<sub>2</sub>:hexane = 1:3, R<sub>f</sub> = 0.3) to give the product **13b** (24 mg, 65%, dr = 87:13) as a colorless oil; IR (neat): 3069, 2951, 2385, 2248, 1888, 1455, 1377, 1254, 1061, 970, 939, 702, 609, 492, 410 cm<sup>-1</sup>; <sup>1</sup>H NMR (CDCl<sub>3</sub>): δ 0.45 (s, 2.4H), 0.48 (s, 2.4H), 0.53 (s, 0.6H), 0.55 (s, 0.6H), 0.61 (br, 3H), 1.17 (d, *J* = 18.4 Hz, 2.4H), 1.22 (d, *J* = 16.2 Hz, 0.6H) 1.51-2.06 (m, 6H), 4.48-4.52 (m, 0.05H), 4.53 (ddt, *J* = 350.1 Hz, 6.8 Hz, 6.3 Hz, 0.9H), 5.39-5.42 (m, 0.05H), 7.35-7.44 (m, 3H), 7.52-7.55 (m, 1.6H), 7.57-7.60 (m, 0.4H); <sup>13</sup>C NMR (CDCl<sub>3</sub>): δ -5.3, -5.2, 16.7, 20.1 (d, *J* = 32.9 Hz), 21.5 (d, *J* = 34.8 Hz), 23.6, 38.9, 127.9, 129.7, 134.5, 134.8; <sup>31</sup>P NMR (CDCl<sub>3</sub>): δ 14.4 (major) (*J* = 50.9 Hz), 34.5 (minor); <sup>11</sup>B NMR (CDCl<sub>3</sub>): δ -44.8(major), -42.3(minor); MS (EI) *m/z* 250 (M<sup>+</sup>); HRMS Calcd for C<sub>13</sub>H<sub>24</sub>BPSi: 250.1478, Found: 250.1469.

## 2-(Dimethyl(phenyl)silyl)phosphinane-Borane (**13c**)

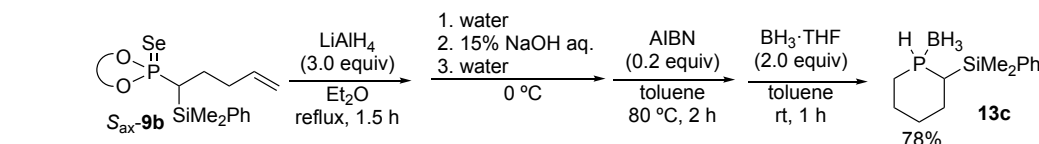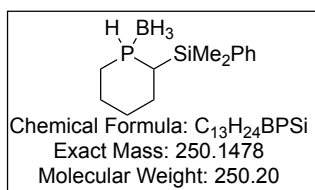

Et<sub>2</sub>O (10 mL) and phosphonoselenoate **9b** (598 mg, 1.0 mmol) was placed in a 20 mL two-necked flask. LAH (110 mg, 3.0 mmol, 3.0 equiv) was added, and the mixture was stirred at reflux temperature for 1.5 h. The resulting mixture was quenched with water (110 μL), sodium hydroxide 15% aqueous solution (110 μL)

and water (330  $\mu$ L). The solution was filtered through diatomite, and concentrated to give the primary phosphine as a colorless oil. This oil and toluene (10 mL) were placed in a 20 mL two-necked flask. To this AIBN (33 mg, 0.2 mmol, 0.2 equiv) added, and the mixture was stirred at 80  $^{\circ}$ C for 2 h. The reaction mixture was cooled to room temperature.  $\text{BH}_3 \cdot \text{THF}$  (1.0 M THF solution, 2 mL, 2.0 mmol, 2.0 equiv) was then added to the solution, and it was stirred for 1 h. To the resulting solution were added water and ether. The aqueous phase was extracted with ether three times. The combined organic layer was dried over  $\text{MgSO}_4$ , filtered, and concentrated. The crude product was purified by column chromatography on silica gel ( $\text{CH}_2\text{Cl}_2$  : hexane = 1 : 3,  $R_f$  = 0.3) to give the product **13c** (195 mg, 78%, dr = 87:13) as a colorless oil; IR (neat): 3068, 2856, 2378, 2256, 1957, 1715, 1589, 1427, 1251, 1028, 917, 831, 701, 553, 470  $\text{cm}^{-1}$ ;  $^1\text{H}$  NMR ( $\text{CDCl}_3$ ):  $\delta$  0.46 (s, 0.4H), 0.46 (s, 0.4H), 0.48 (s, 2.6H), 0.51 (s, 2.6H), 0.61 (br, 3H), 1.03-1.14 (m, 1H), 1.16-1.34 (m, 2H), 1.41-1.63 (m, 2H), 1.78-1.81 (m, 1H), 1.86-1.95 (m, 2H), 1.98-2.11 (m, 1H), 4.25-4.26 (m, 0.05H), 4.32 (ddt,  $J$  = 352.3 Hz, 16.6 Hz, 6.1 Hz, 0.9H), 5.16-5.19 (m, 0.05H), 7.36-7.43 (m, 3H), 7.52-7.56 (m, 2H);  $^{13}\text{C}$  NMR ( $\text{CDCl}_3$ ):  $\delta$  -4.0, -2.5, 19.2 (d,  $J$  = 18.8 Hz), 20.8 (d,  $J$  = 34.8 Hz), 25.1 (d,  $J$  = 7.5 Hz), 27.3 (d,  $J$  = 8.5 Hz), 27.4 (d,  $J$  = 5.6 Hz), 127.9, 129.6, 134.1, 135.5;  $^{31}\text{P}$  NMR ( $\text{CDCl}_3$ ):  $\delta$  -19.7 (minor), -8.6 (major) ( $J$  = 57.2 Hz);  $^{11}\text{B}$  NMR ( $\text{CDCl}_3$ ):  $\delta$  -44.9 (minor), -42.3 (major); MS (EI)  $m/z$  250 ( $\text{M}^+$ ); HRMS Calcd for  $\text{C}_{13}\text{H}_{24}\text{BPSi}$ : 250.1478, Found: 250.1494.



## Cartesian Coordinates

### Radical 8b

| Center<br>Number | Atomic<br>Number | Atomic<br>Type | Coordinates (Angstroms) |           |           |
|------------------|------------------|----------------|-------------------------|-----------|-----------|
|                  |                  |                | X                       | Y         | Z         |
| 1                | 15               | 0              | -2.394628               | -1.583971 | -0.203126 |
| 2                | 6                | 0              | -0.871100               | -0.698832 | 0.342933  |
| 3                | 6                | 0              | -0.650032               | -1.098304 | 1.819725  |
| 4                | 1                | 0              | 0.231749                | -0.618375 | 2.222566  |
| 5                | 1                | 0              | -1.488071               | -0.809901 | 2.446759  |
| 6                | 1                | 0              | -0.515796               | -2.172958 | 1.928776  |
| 7                | 8                | 0              | -2.959785               | -1.184880 | -1.515413 |
| 8                | 14               | 0              | -1.196329               | 1.223068  | 0.216175  |
| 9                | 6                | 0              | -1.210389               | 1.812298  | -1.575998 |
| 10               | 1                | 0              | -1.619835               | 2.819357  | -1.616475 |
| 11               | 1                | 0              | -0.219880               | 1.851613  | -2.015128 |
| 12               | 1                | 0              | -1.836017               | 1.174773  | -2.191641 |
| 13               | 6                | 0              | 0.091459                | 2.175580  | 1.222870  |
| 14               | 1                | 0              | -0.092540               | 3.242426  | 1.113459  |
| 15               | 1                | 0              | 0.025853                | 1.946943  | 2.283059  |
| 16               | 1                | 0              | 1.107832                | 1.981671  | 0.899882  |
| 17               | 6                | 0              | -2.893601               | 1.605659  | 0.968662  |
| 18               | 1                | 0              | -3.006222               | 1.226747  | 1.981043  |
| 19               | 1                | 0              | -3.018872               | 2.685073  | 1.017528  |
| 20               | 1                | 0              | -3.709165               | 1.214388  | 0.368423  |
| 21               | 6                | 0              | 0.270369                | -1.243133 | -0.579992 |
| 22               | 1                | 0              | -0.014107               | -1.070924 | -1.612096 |
| 23               | 1                | 0              | 0.307723                | -2.323906 | -0.455277 |
| 24               | 6                | 0              | 1.675870                | -0.706062 | -0.371040 |
| 25               | 6                | 0              | 2.230290                | 0.200333  | -1.267988 |
| 26               | 6                | 0              | 2.474449                | -1.154424 | 0.678920  |
| 27               | 6                | 0              | 3.521290                | 0.677692  | -1.101470 |

|    |   |   |           |           |           |
|----|---|---|-----------|-----------|-----------|
| 28 | 1 | 0 | 1.655074  | 0.527823  | -2.115175 |
| 29 | 6 | 0 | 3.763405  | -0.680229 | 0.850269  |
| 30 | 1 | 0 | 2.094002  | -1.893020 | 1.361812  |
| 31 | 6 | 0 | 4.290648  | 0.245438  | -0.035979 |
| 32 | 1 | 0 | 3.925063  | 1.379446  | -1.809968 |
| 33 | 1 | 0 | 4.359176  | -1.041109 | 1.670305  |
| 34 | 1 | 0 | 5.293102  | 0.612520  | 0.095016  |
| 35 | 1 | 0 | -3.288712 | -1.433043 | 0.865409  |

Radical, **8a**

| Center<br>Number | Atomic<br>Number | Atomic<br>Type | Coordinates (Angstroms) |           |           |
|------------------|------------------|----------------|-------------------------|-----------|-----------|
|                  |                  |                | X                       | Y         | Z         |
| 1                | 15               | 0              | -2.398599               | -1.574091 | -0.121686 |
| 2                | 1                | 0              | -2.064932               | -2.917163 | 0.124643  |
| 3                | 6                | 0              | -0.873581               | -0.658681 | 0.361484  |
| 4                | 6                | 0              | -0.615551               | -1.019178 | 1.842909  |
| 5                | 1                | 0              | 0.286269                | -0.545427 | 2.206627  |
| 6                | 1                | 0              | -1.432555               | -0.702058 | 2.483409  |
| 7                | 1                | 0              | -0.495104               | -2.093011 | 1.977978  |
| 8                | 8                | 0              | -2.897033               | -1.333121 | -1.498455 |
| 9                | 14               | 0              | -1.232168               | 1.251311  | 0.199887  |
| 10               | 6                | 0              | -1.282177               | 1.800601  | -1.604781 |
| 11               | 1                | 0              | -1.699197               | 2.803618  | -1.662957 |
| 12               | 1                | 0              | -0.300744               | 1.835120  | -2.064635 |
| 13               | 1                | 0              | -1.913834               | 1.143244  | -2.193083 |
| 14               | 6                | 0              | 0.051784                | 2.245710  | 1.168756  |
| 15               | 1                | 0              | -0.151338               | 3.306975  | 1.041224  |
| 16               | 1                | 0              | 0.003950                | 2.036512  | 2.233897  |
| 17               | 1                | 0              | 1.067131                | 2.062282  | 0.836379  |
| 18               | 6                | 0              | -2.927952               | 1.609684  | 0.966766  |

|    |   |   |           |           |           |
|----|---|---|-----------|-----------|-----------|
| 19 | 1 | 0 | -3.021443 | 1.234954  | 1.982546  |
| 20 | 1 | 0 | -3.077777 | 2.686318  | 1.008654  |
| 21 | 1 | 0 | -3.741188 | 1.193785  | 0.379769  |
| 22 | 6 | 0 | 0.259236  | -1.211234 | -0.571382 |
| 23 | 1 | 0 | -0.031467 | -1.035126 | -1.600366 |
| 24 | 1 | 0 | 0.292139  | -2.292717 | -0.448670 |
| 25 | 6 | 0 | 1.670222  | -0.685872 | -0.366055 |
| 26 | 6 | 0 | 2.216491  | 0.244553  | -1.243345 |
| 27 | 6 | 0 | 2.480560  | -1.168109 | 0.659392  |
| 28 | 6 | 0 | 3.512223  | 0.710151  | -1.081143 |
| 29 | 1 | 0 | 1.631363  | 0.600099  | -2.072178 |
| 30 | 6 | 0 | 3.774441  | -0.705705 | 0.826439  |
| 31 | 1 | 0 | 2.104707  | -1.923619 | 1.326369  |
| 32 | 6 | 0 | 4.294257  | 0.242512  | -0.039940 |
| 33 | 1 | 0 | 3.909918  | 1.430427  | -1.774333 |
| 34 | 1 | 0 | 4.379470  | -1.093187 | 1.627328  |
| 35 | 1 | 0 | 5.300521  | 0.600370  | 0.087310  |

Product 7a

| Center<br>Number | Atomic<br>Number | Atomic<br>Type | Coordinates (Angstroms) |           |           |
|------------------|------------------|----------------|-------------------------|-----------|-----------|
|                  |                  |                | X                       | Y         | Z         |
| 1                | 6                | 0              | -0.344524               | 0.521126  | -0.423868 |
| 2                | 6                | 0              | -0.355598               | 0.262854  | -1.948531 |
| 3                | 1                | 0              | -1.355604               | -0.013850 | -2.291040 |
| 4                | 1                | 0              | -0.051132               | 1.149550  | -2.514869 |
| 5                | 1                | 0              | 0.319365                | -0.554950 | -2.234304 |
| 6                | 8                | 0              | 1.467767                | 1.690302  | 1.437367  |
| 7                | 14               | 0              | -1.531431               | 2.029964  | -0.018300 |
| 8                | 6                | 0              | -1.802054               | 2.230902  | 1.838938  |
| 9                | 1                | 0              | -2.302341               | 3.186541  | 2.034776  |

|    |    |   |           |           |           |
|----|----|---|-----------|-----------|-----------|
| 10 | 1  | 0 | -2.426220 | 1.442743  | 2.268446  |
| 11 | 1  | 0 | -0.835934 | 2.236782  | 2.351164  |
| 12 | 6  | 0 | -3.184116 | 1.803660  | -0.918422 |
| 13 | 1  | 0 | -3.838154 | 2.650791  | -0.679493 |
| 14 | 1  | 0 | -3.060985 | 1.787578  | -2.006339 |
| 15 | 1  | 0 | -3.702597 | 0.888371  | -0.622068 |
| 16 | 6  | 0 | -0.741581 | 3.624523  | -0.677613 |
| 17 | 1  | 0 | -0.474817 | 3.565276  | -1.738221 |
| 18 | 1  | 0 | -1.459775 | 4.445923  | -0.571378 |
| 19 | 1  | 0 | 0.154016  | 3.896323  | -0.111277 |
| 20 | 6  | 0 | -0.664338 | -0.782717 | 0.386614  |
| 21 | 1  | 0 | -0.510696 | -0.574316 | 1.450662  |
| 22 | 1  | 0 | 0.080091  | -1.541927 | 0.109470  |
| 23 | 6  | 0 | -2.035447 | -1.413078 | 0.208442  |
| 24 | 6  | 0 | -3.017094 | -1.291721 | 1.202182  |
| 25 | 6  | 0 | -2.340922 | -2.185945 | -0.922975 |
| 26 | 6  | 0 | -4.271994 | -1.885535 | 1.057077  |
| 27 | 1  | 0 | -2.790879 | -0.735654 | 2.107164  |
| 28 | 6  | 0 | -3.593965 | -2.779794 | -1.074668 |
| 29 | 1  | 0 | -1.584740 | -2.338531 | -1.687669 |
| 30 | 6  | 0 | -4.568565 | -2.625956 | -0.087361 |
| 31 | 1  | 0 | -5.013546 | -1.775399 | 1.843177  |
| 32 | 1  | 0 | -3.805148 | -3.371932 | -1.960645 |
| 33 | 1  | 0 | -5.543399 | -3.090396 | -0.202743 |
| 34 | 15 | 0 | 1.363129  | 1.070459  | 0.066480  |
| 35 | 1  | 0 | 1.678824  | 1.953260  | -1.003831 |
| 36 | 6  | 0 | 2.599912  | -0.291436 | -0.222327 |
| 37 | 6  | 0 | 3.891729  | 0.298593  | -0.833877 |
| 38 | 6  | 0 | 2.909194  | -1.045906 | 1.089148  |
| 39 | 1  | 0 | 2.168870  | -0.995502 | -0.949206 |
| 40 | 6  | 0 | 4.971695  | -0.776305 | -1.029924 |
| 41 | 1  | 0 | 4.277717  | 1.081432  | -0.166319 |
| 42 | 1  | 0 | 3.669616  | 0.785111  | -1.791081 |

|    |   |   |          |           |           |
|----|---|---|----------|-----------|-----------|
| 43 | 6 | 0 | 3.996498 | -2.113310 | 0.885765  |
| 44 | 1 | 0 | 3.231722 | -0.316436 | 1.841017  |
| 45 | 1 | 0 | 2.001472 | -1.511009 | 1.487791  |
| 46 | 6 | 0 | 5.274414 | -1.518625 | 0.278869  |
| 47 | 1 | 0 | 5.883156 | -0.315935 | -1.429556 |
| 48 | 1 | 0 | 4.629443 | -1.497826 | -1.785702 |
| 49 | 1 | 0 | 4.219385 | -2.597003 | 1.844151  |
| 50 | 1 | 0 | 3.613933 | -2.901699 | 0.221472  |
| 51 | 1 | 0 | 6.016708 | -2.306661 | 0.105435  |
| 52 | 1 | 0 | 5.723138 | -0.817440 | 0.996270  |

-----

**Product 7a'**

-----

| Center<br>Number | Atomic<br>Number | Atomic<br>Type | Coordinates (Angstroms) |           |           |
|------------------|------------------|----------------|-------------------------|-----------|-----------|
|                  |                  |                | X                       | Y         | Z         |
| 1                | 6                | 0              | 0.385691                | -0.159454 | -0.076700 |
| 2                | 6                | 0              | 0.234646                | -1.181836 | 1.071231  |
| 3                | 1                | 0              | 1.164798                | -1.264325 | 1.638866  |
| 4                | 1                | 0              | -0.551825               | -0.901183 | 1.778256  |
| 5                | 1                | 0              | -0.000230               | -2.186750 | 0.694783  |
| 6                | 8                | 0              | -1.204462               | 1.051610  | -2.079083 |
| 7                | 14               | 0              | 0.716555                | 1.628259  | 0.648215  |
| 8                | 6                | 0              | 1.225603                | 2.846474  | -0.700863 |
| 9                | 1                | 0              | 1.213145                | 3.866374  | -0.299101 |
| 10               | 1                | 0              | 2.231404                | 2.661613  | -1.087427 |
| 11               | 1                | 0              | 0.516361                | 2.790463  | -1.531334 |
| 12               | 6                | 0              | 2.036010                | 1.526581  | 2.005203  |
| 13               | 1                | 0              | 2.211855                | 2.531153  | 2.408102  |
| 14               | 1                | 0              | 1.716583                | 0.894544  | 2.840610  |
| 15               | 1                | 0              | 2.990745                | 1.143220  | 1.636962  |
| 16               | 6                | 0              | -0.855869               | 2.301771  | 1.471477  |
| 17               | 1                | 0              | -1.240350               | 1.648616  | 2.262177  |

|    |    |   |           |           |           |
|----|----|---|-----------|-----------|-----------|
| 18 | 1  | 0 | -0.617080 | 3.263578  | 1.940517  |
| 19 | 1  | 0 | -1.657713 | 2.484097  | 0.750104  |
| 20 | 6  | 0 | 1.489306  | -0.627623 | -1.100444 |
| 21 | 1  | 0 | 1.494019  | 0.070868  | -1.943259 |
| 22 | 1  | 0 | 1.166497  | -1.596387 | -1.509063 |
| 23 | 6  | 0 | 2.912247  | -0.799596 | -0.597882 |
| 24 | 6  | 0 | 3.900623  | 0.149643  | -0.895583 |
| 25 | 6  | 0 | 3.298489  | -1.943049 | 0.119431  |
| 26 | 6  | 0 | 5.216950  | -0.014189 | -0.461318 |
| 27 | 1  | 0 | 3.638656  | 1.021446  | -1.487552 |
| 28 | 6  | 0 | 4.611922  | -2.111183 | 0.558303  |
| 29 | 1  | 0 | 2.567200  | -2.720239 | 0.321990  |
| 30 | 6  | 0 | 5.576411  | -1.142824 | 0.275658  |
| 31 | 1  | 0 | 5.962178  | 0.736785  | -0.707652 |
| 32 | 1  | 0 | 4.883919  | -3.005410 | 1.111978  |
| 33 | 1  | 0 | 6.600169  | -1.274124 | 0.613335  |
| 34 | 15 | 0 | -1.160794 | -0.109208 | -1.118430 |
| 35 | 1  | 0 | -1.107527 | -1.385129 | -1.759500 |
| 36 | 6  | 0 | -2.696167 | -0.292857 | -0.075751 |
| 37 | 6  | 0 | -3.837342 | 0.558330  | -0.675110 |
| 38 | 6  | 0 | -3.138924 | -1.764441 | 0.070820  |
| 39 | 1  | 0 | -2.466354 | 0.101412  | 0.921789  |
| 40 | 6  | 0 | -5.113590 | 0.444464  | 0.172471  |
| 41 | 1  | 0 | -4.045493 | 0.216070  | -1.697335 |
| 42 | 1  | 0 | -3.520852 | 1.600780  | -0.769058 |
| 43 | 6  | 0 | -4.421701 | -1.880841 | 0.911154  |
| 44 | 1  | 0 | -3.322409 | -2.183852 | -0.928293 |
| 45 | 1  | 0 | -2.345062 | -2.370830 | 0.520318  |
| 46 | 6  | 0 | -5.555193 | -1.016564 | 0.340975  |
| 47 | 1  | 0 | -5.916328 | 1.033482  | -0.286640 |
| 48 | 1  | 0 | -4.931507 | 0.885478  | 1.163033  |
| 49 | 1  | 0 | -4.732651 | -2.930885 | 0.967732  |
| 50 | 1  | 0 | -4.206093 | -1.564159 | 1.941510  |

|    |   |   |           |           |           |
|----|---|---|-----------|-----------|-----------|
| 51 | 1 | 0 | -6.438822 | -1.076836 | 0.987245  |
| 52 | 1 | 0 | -5.856058 | -1.417091 | -0.637420 |

---

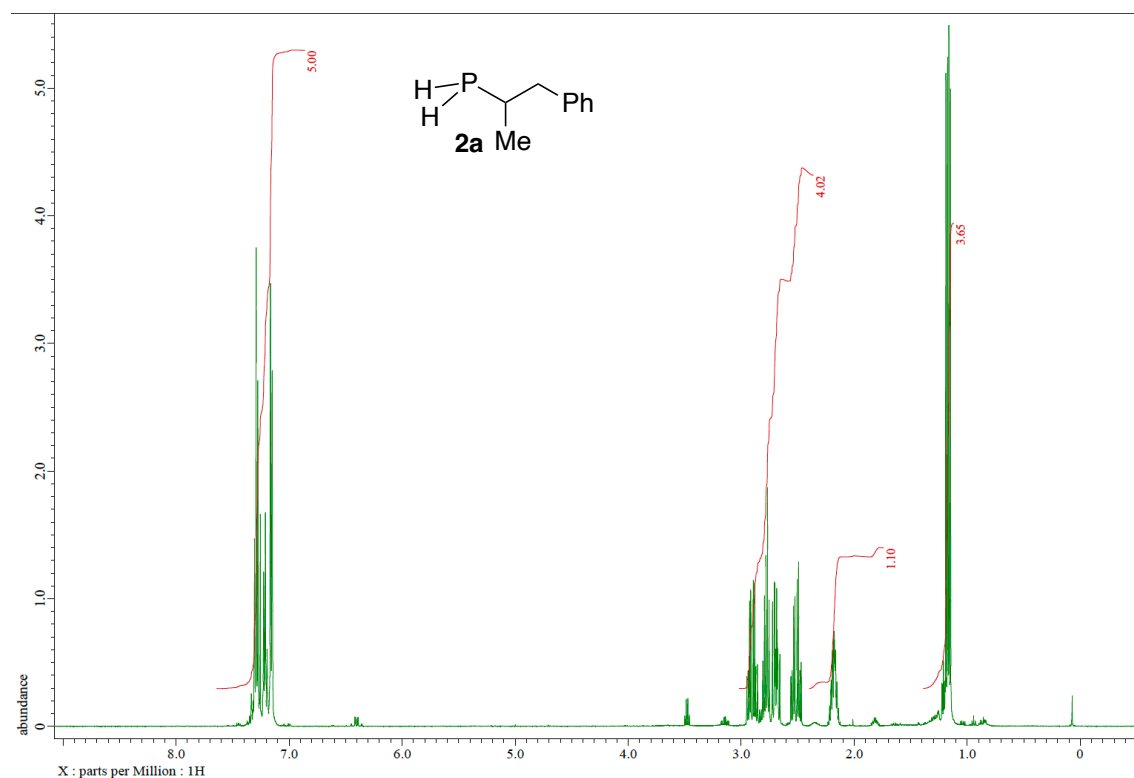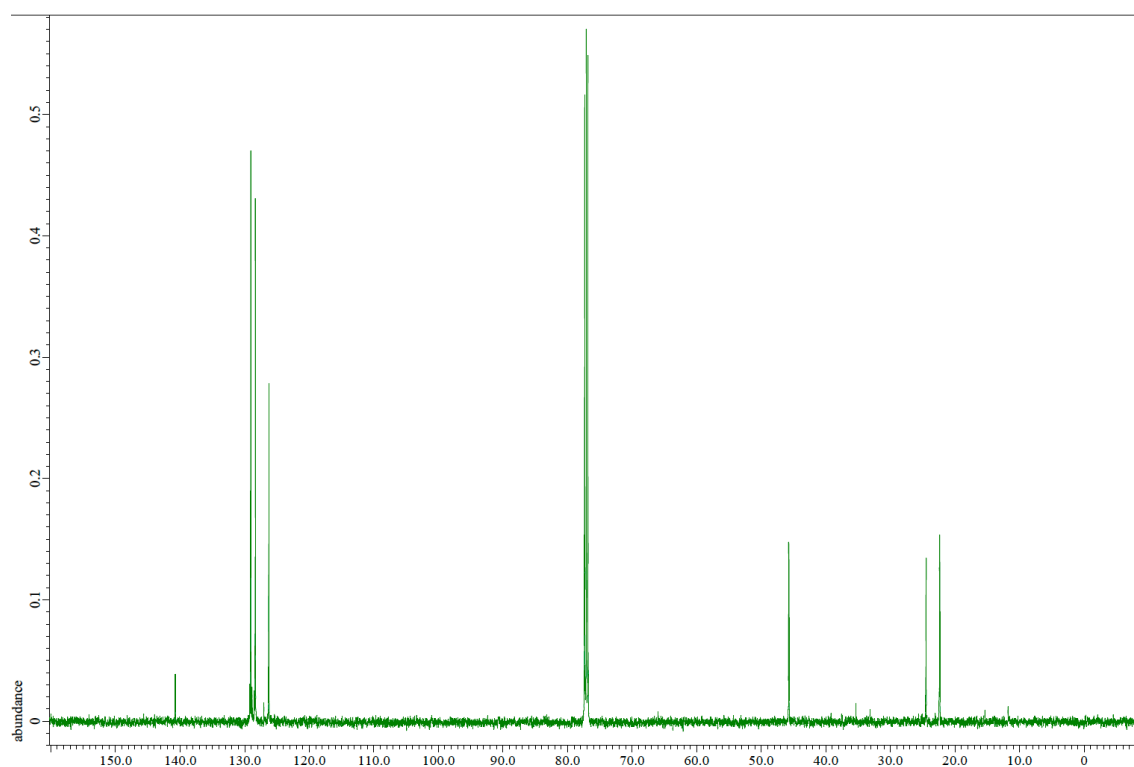



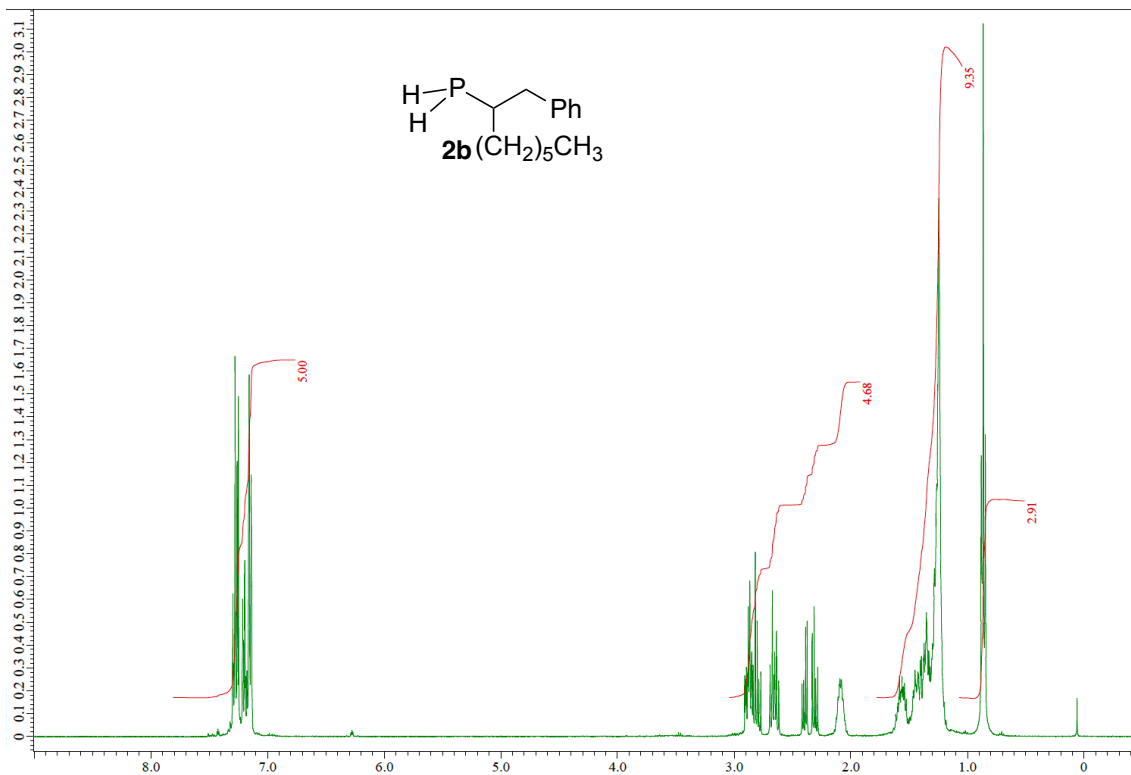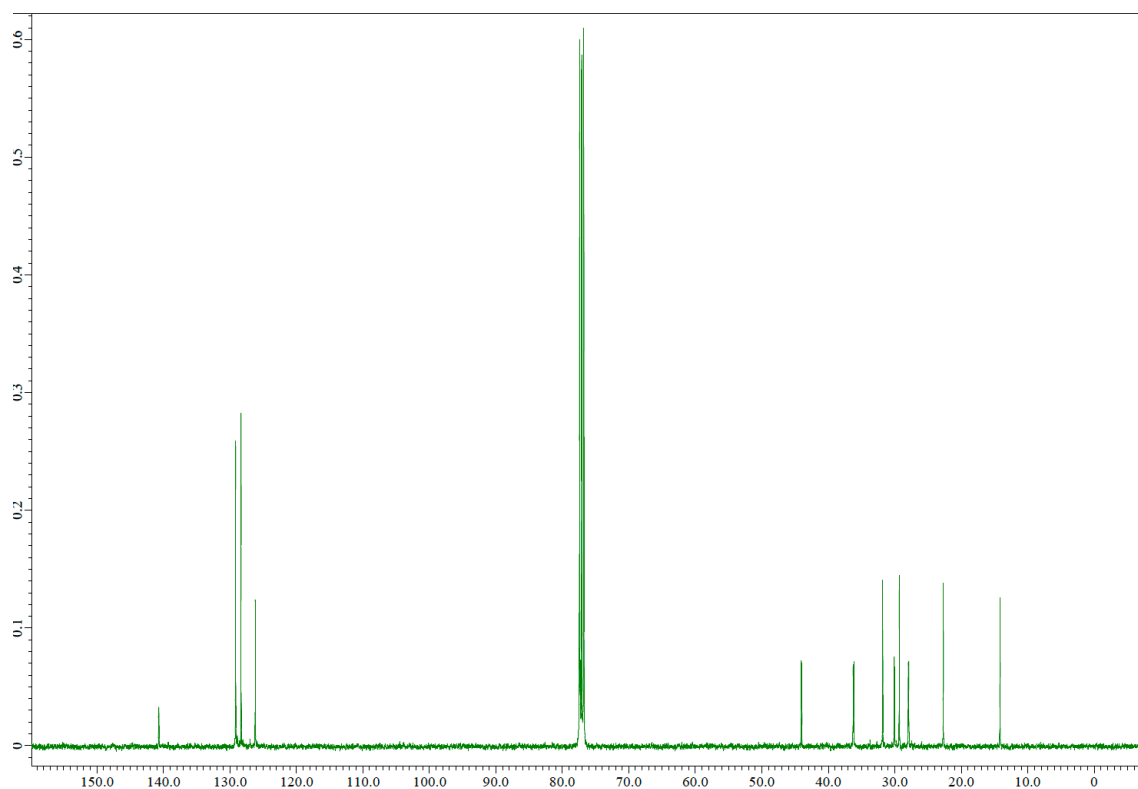

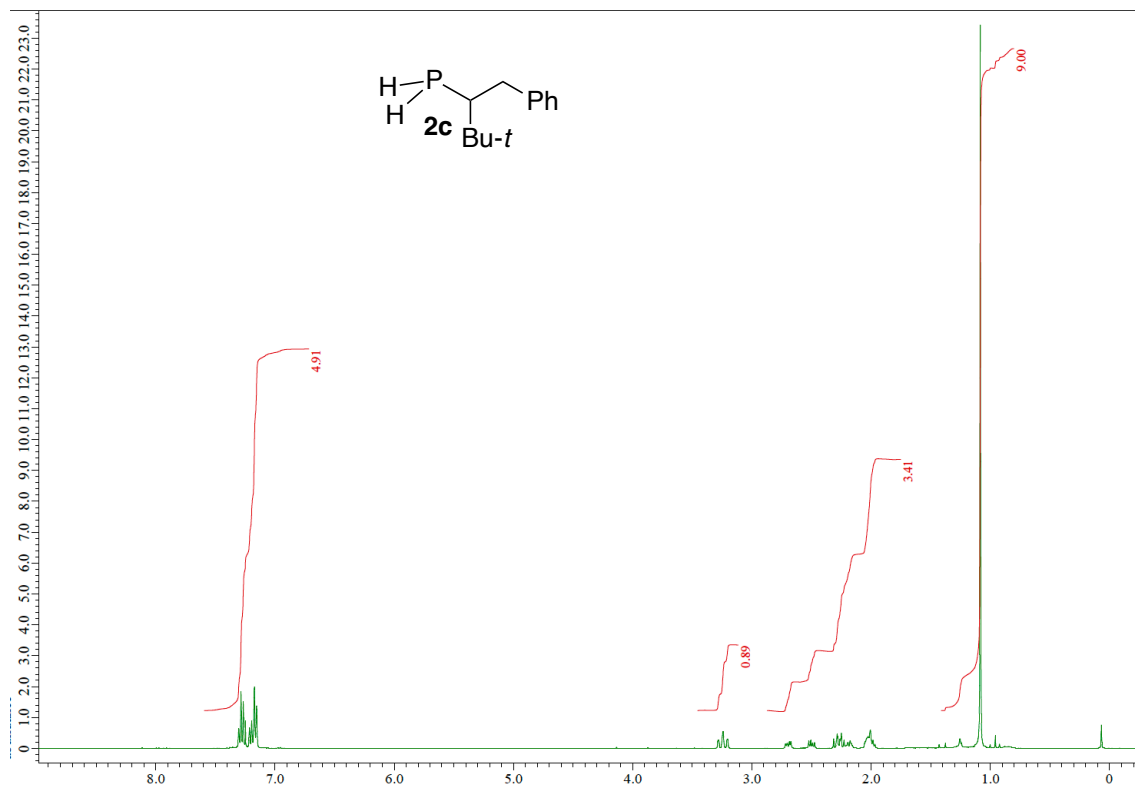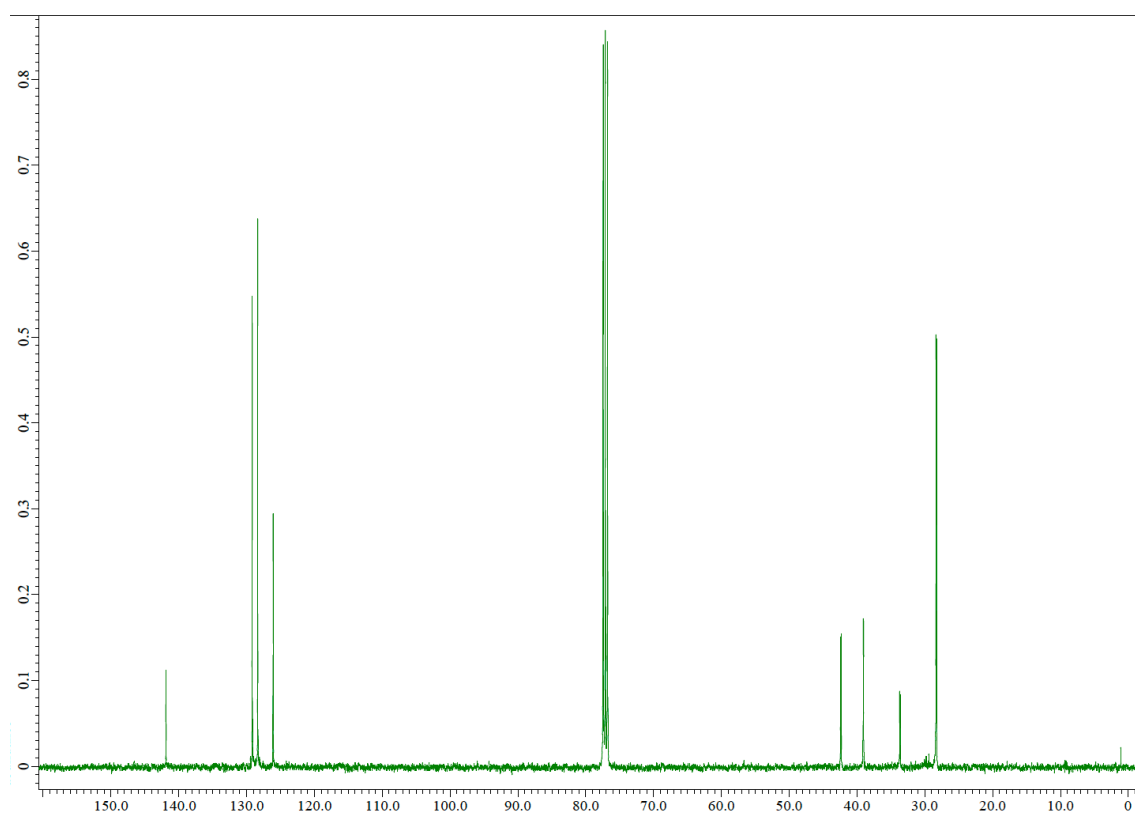

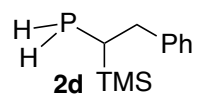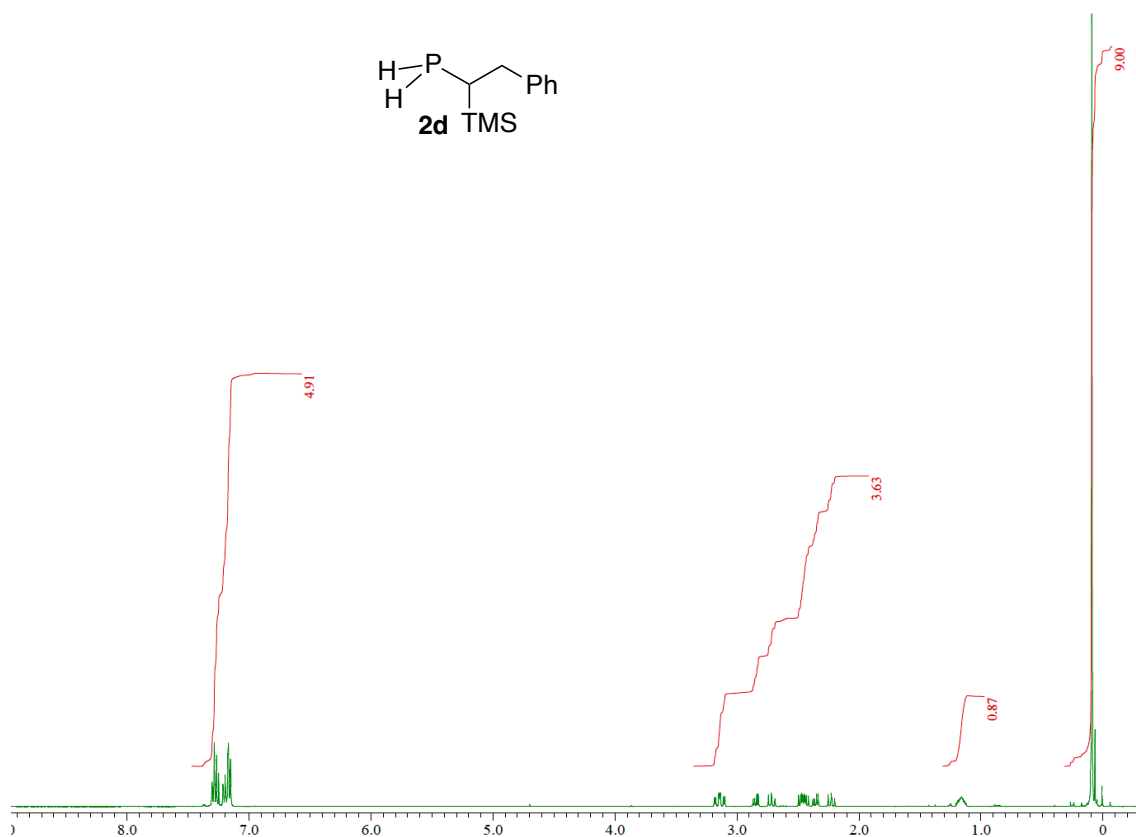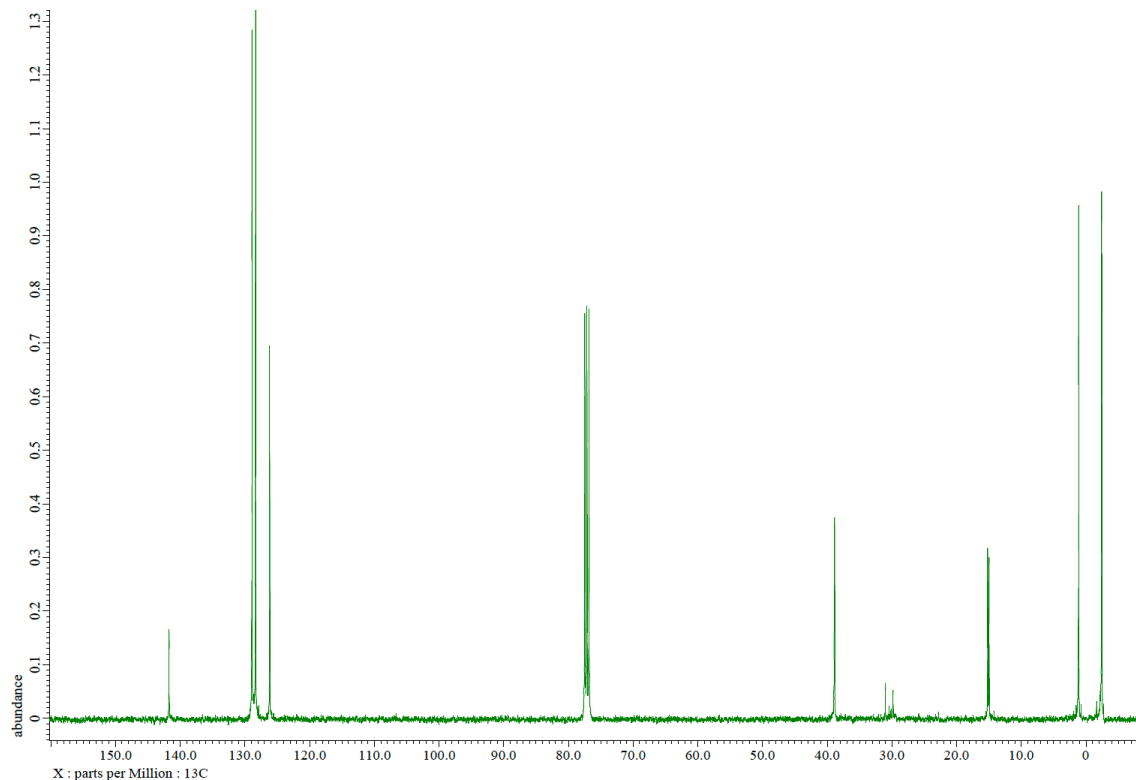

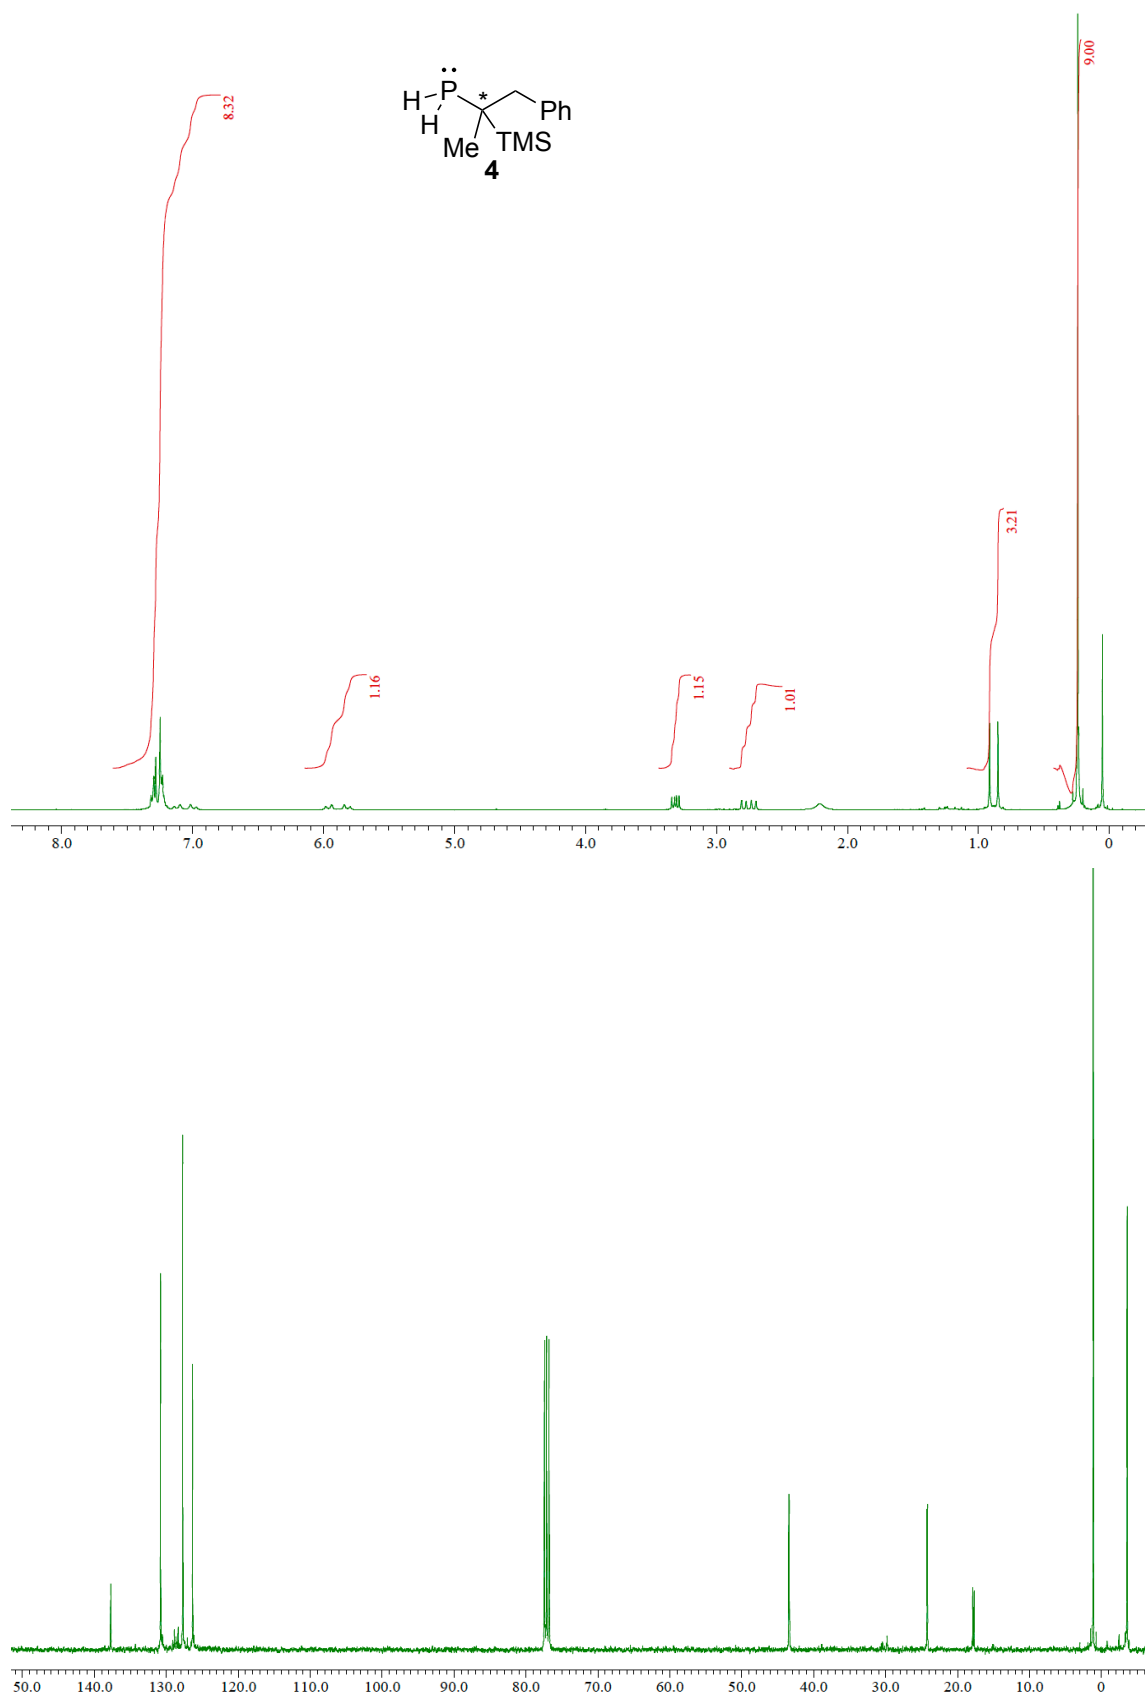

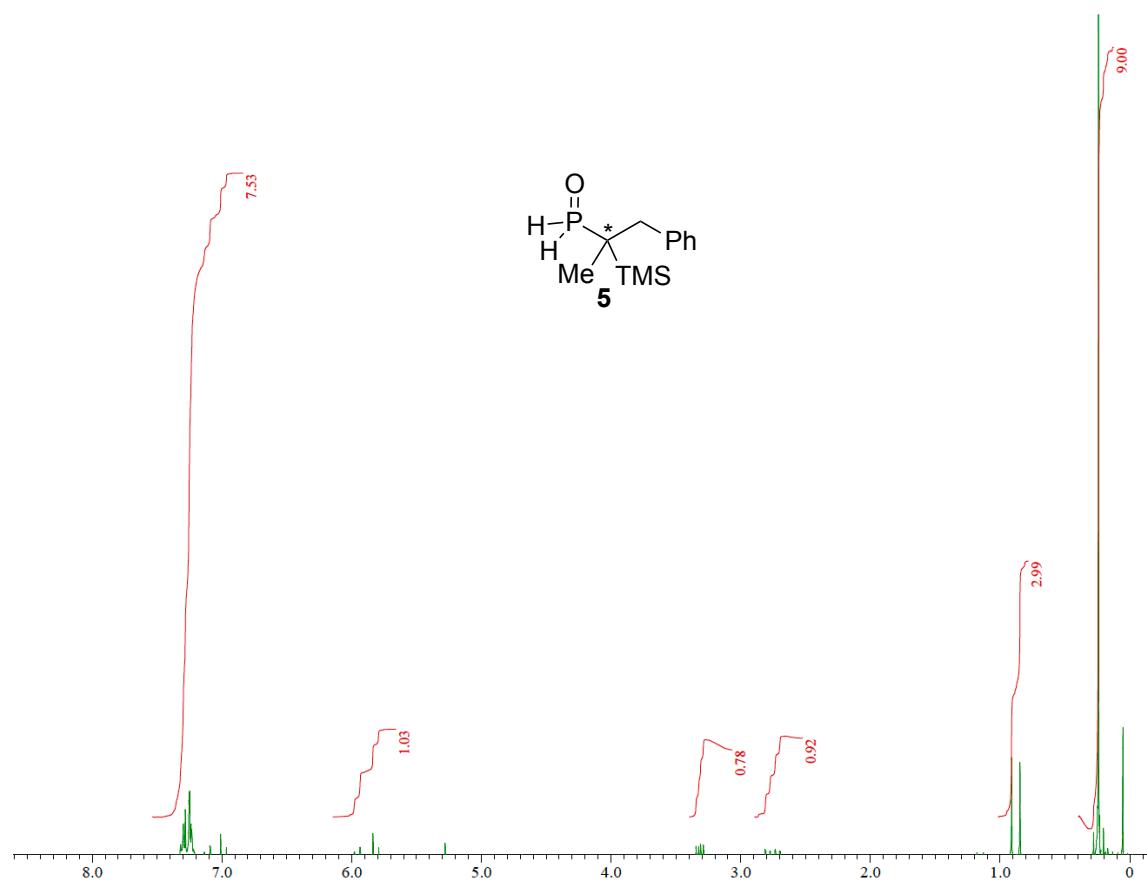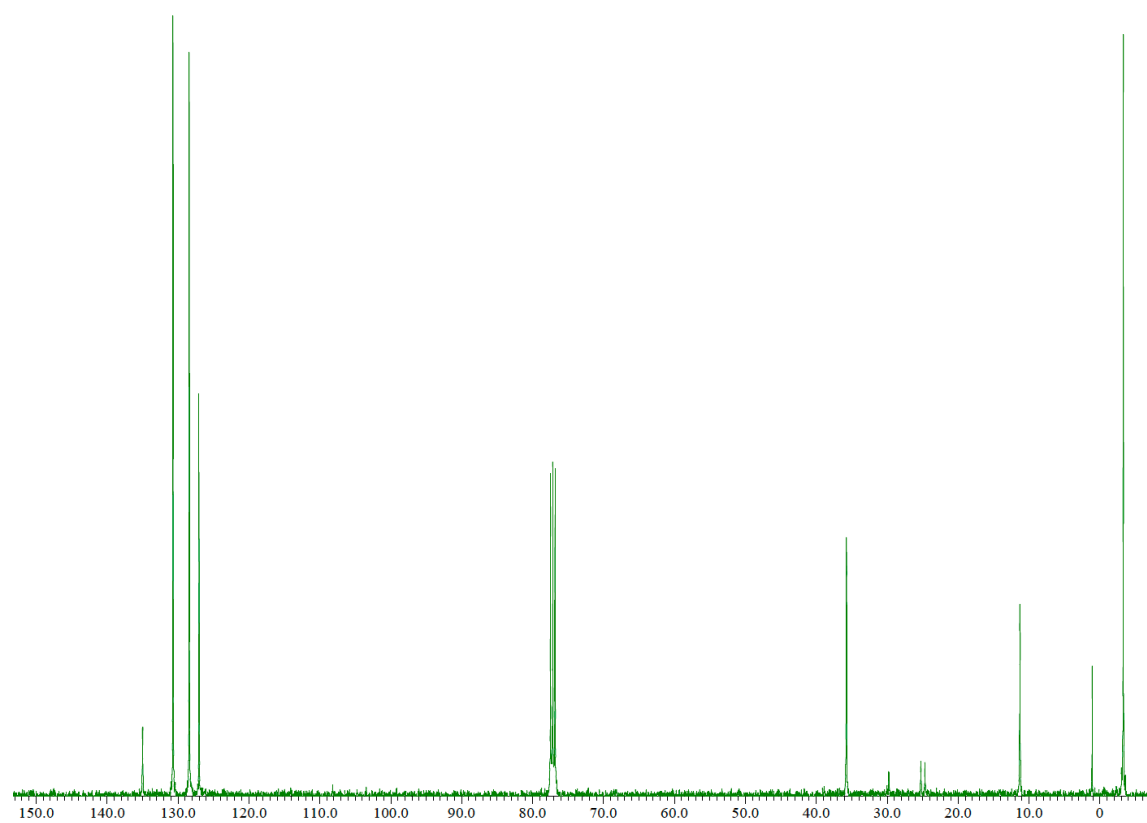

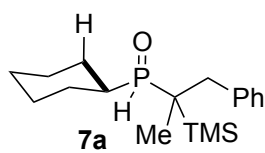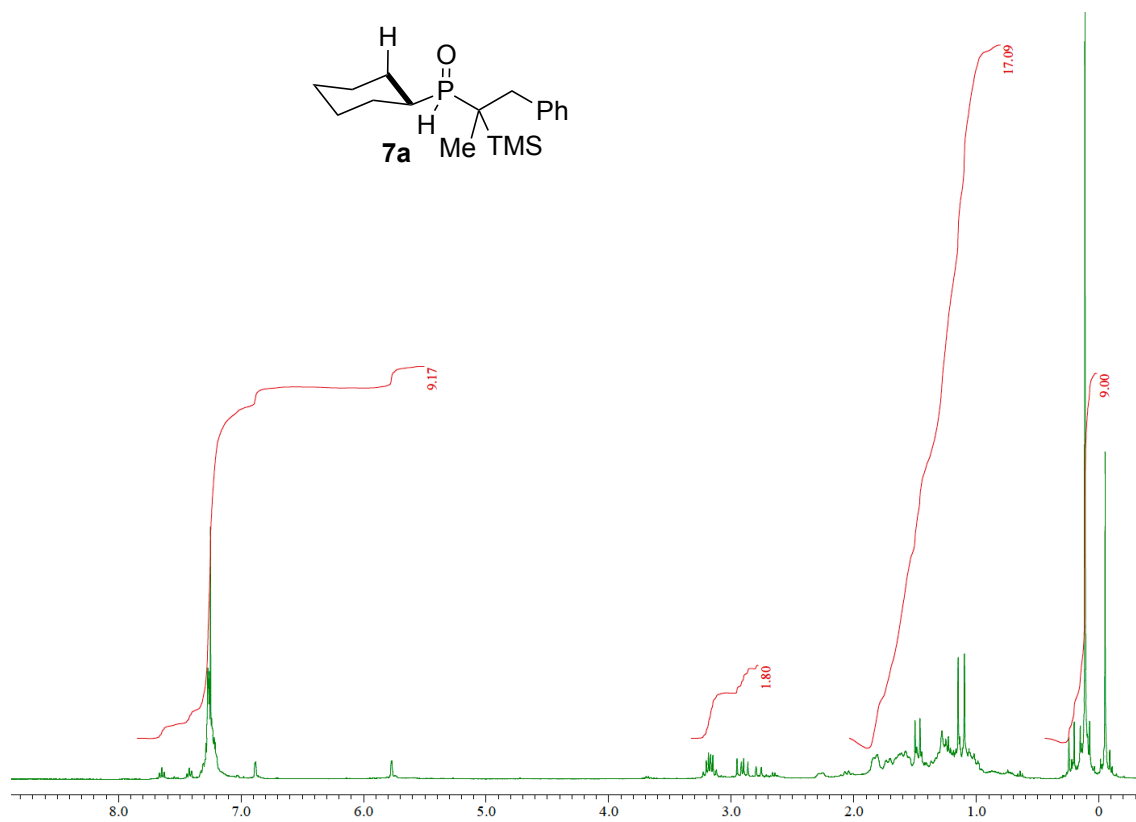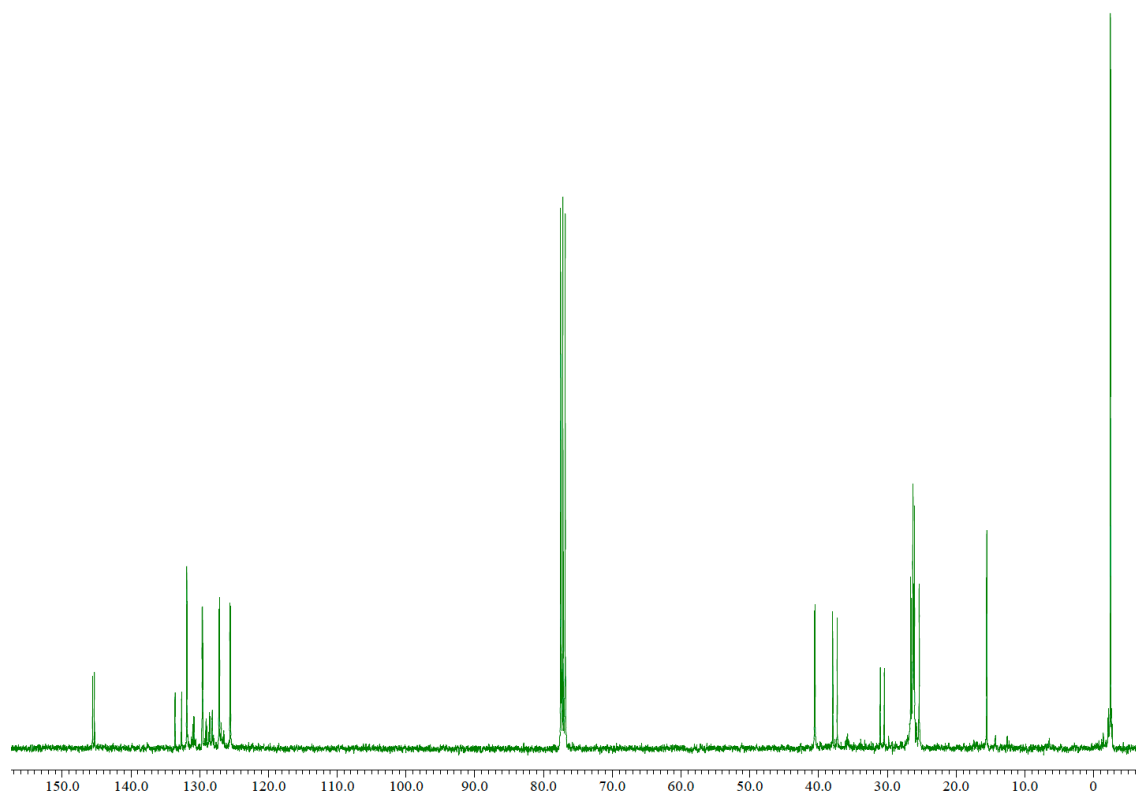

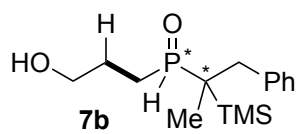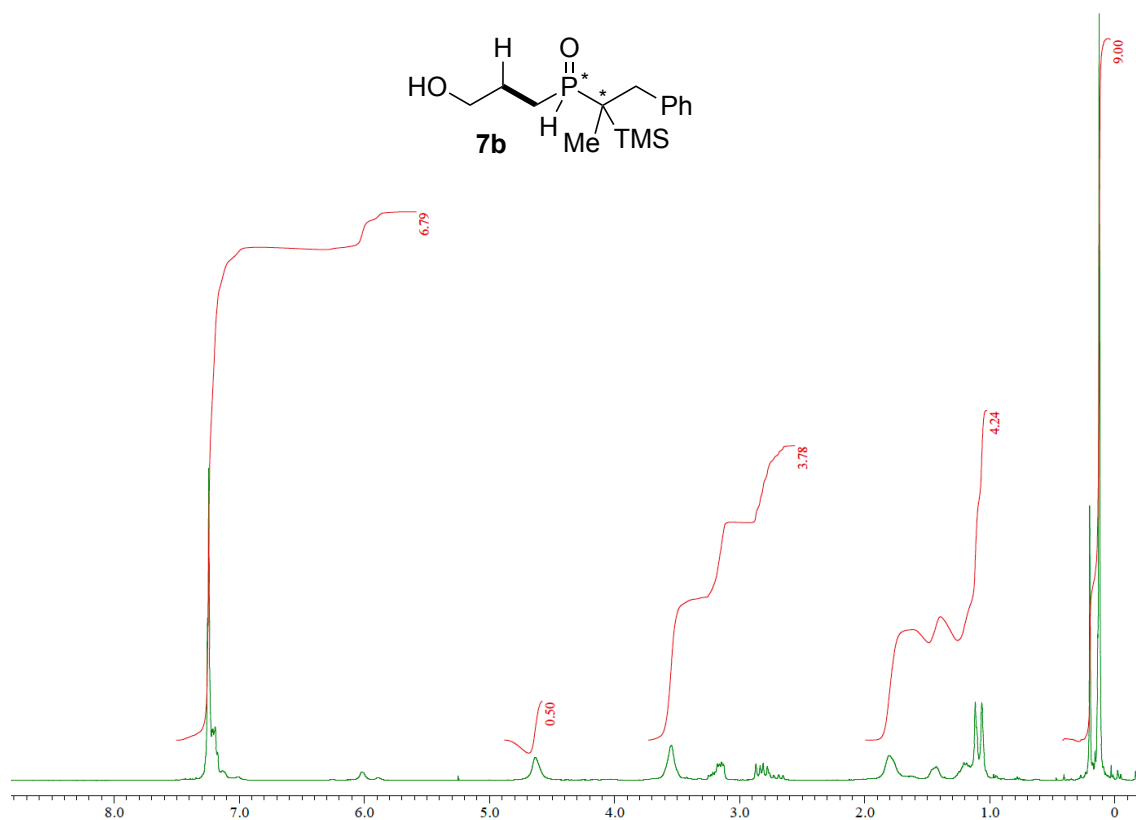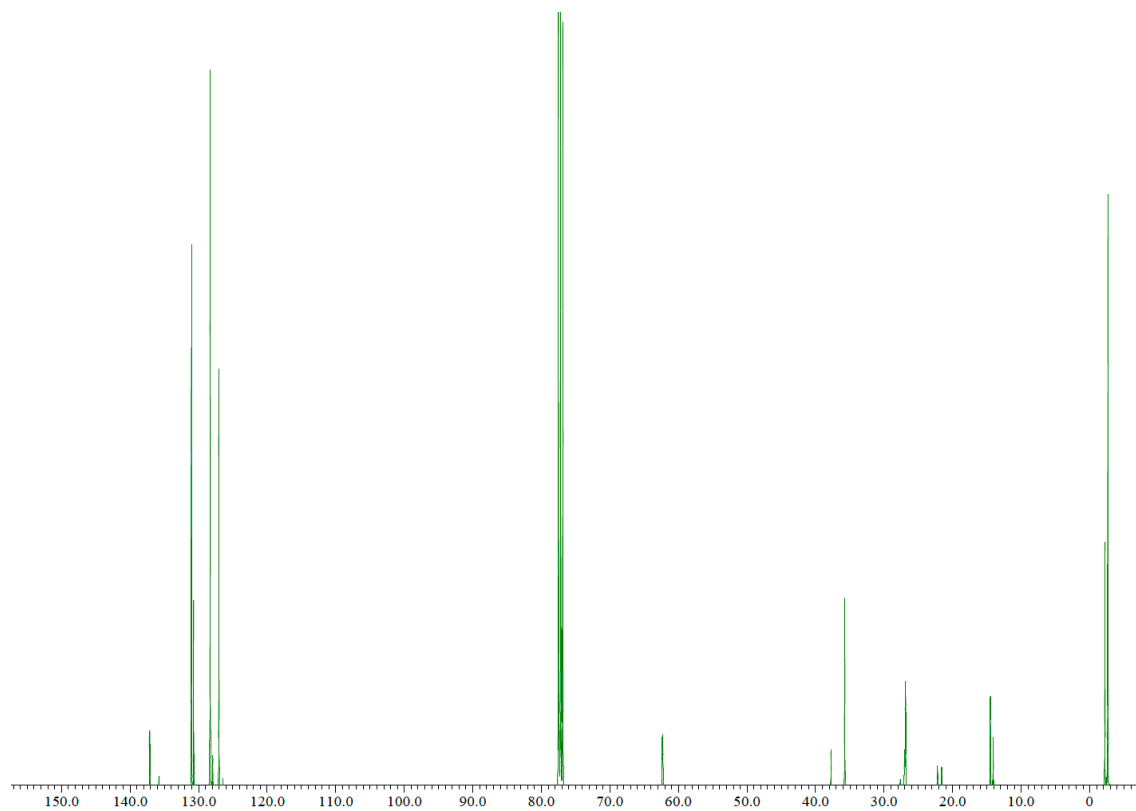

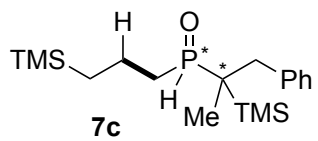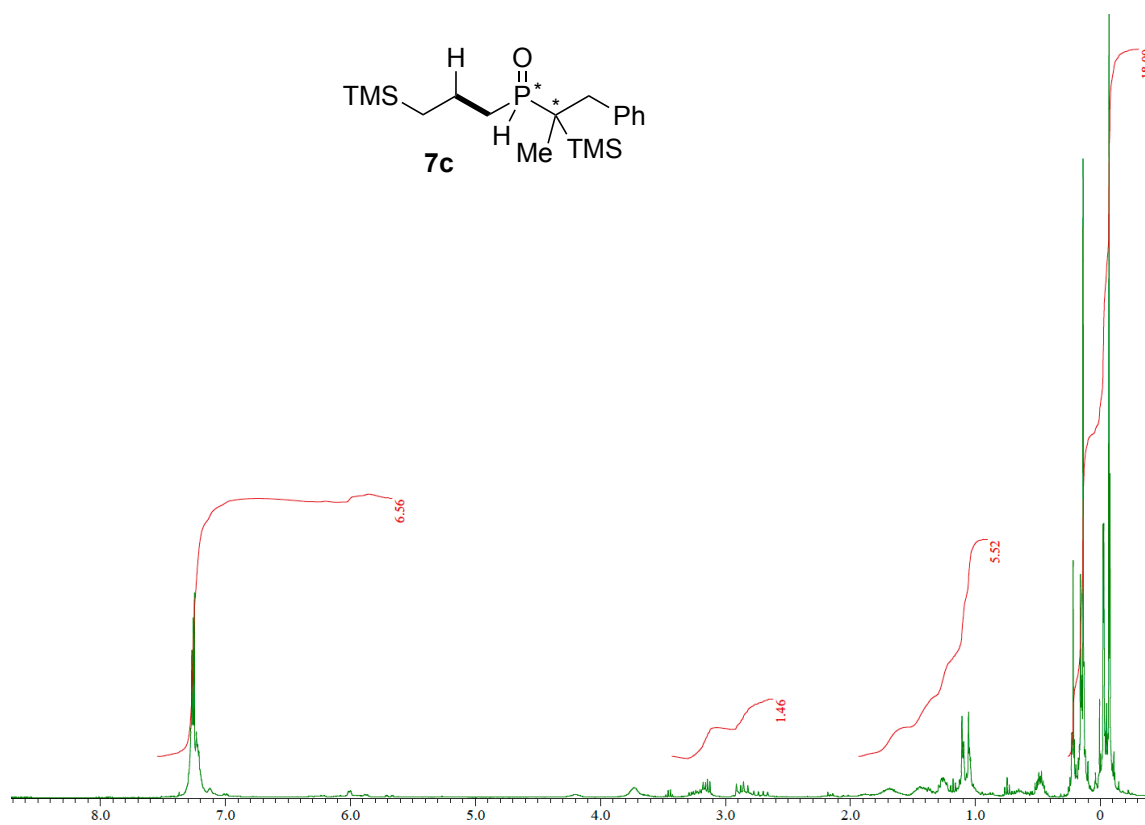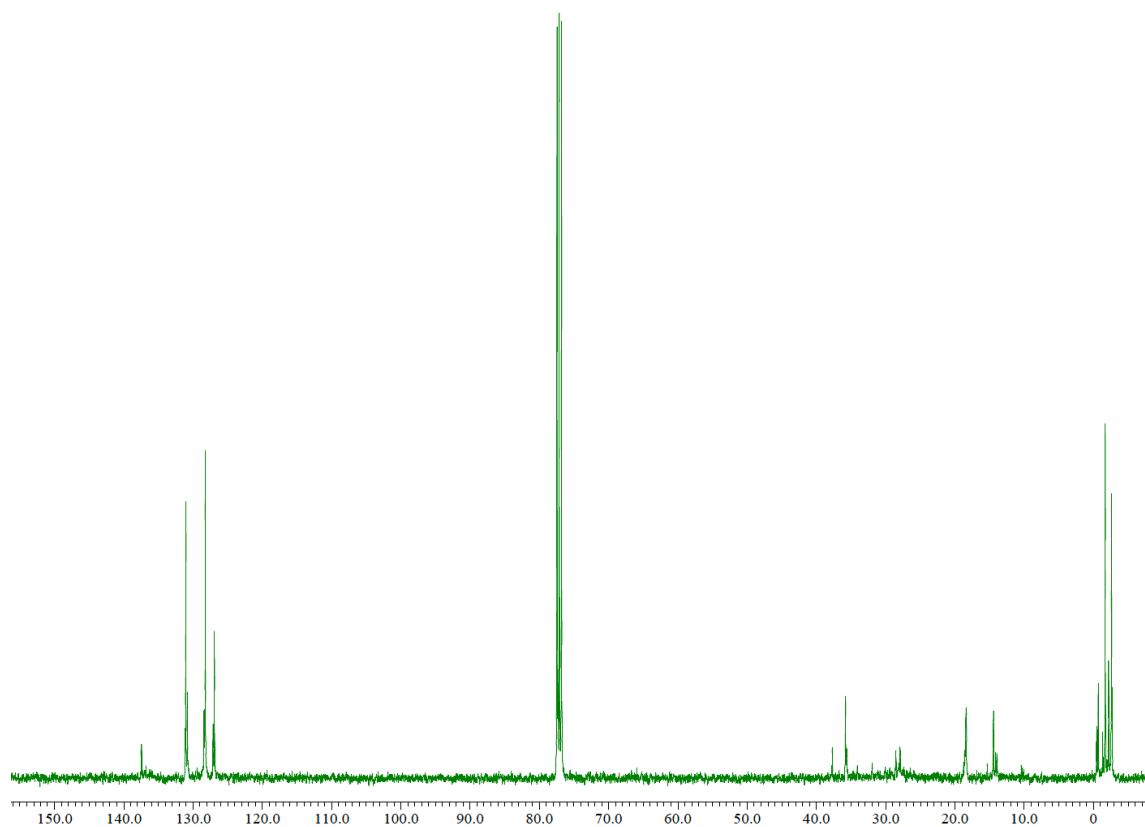



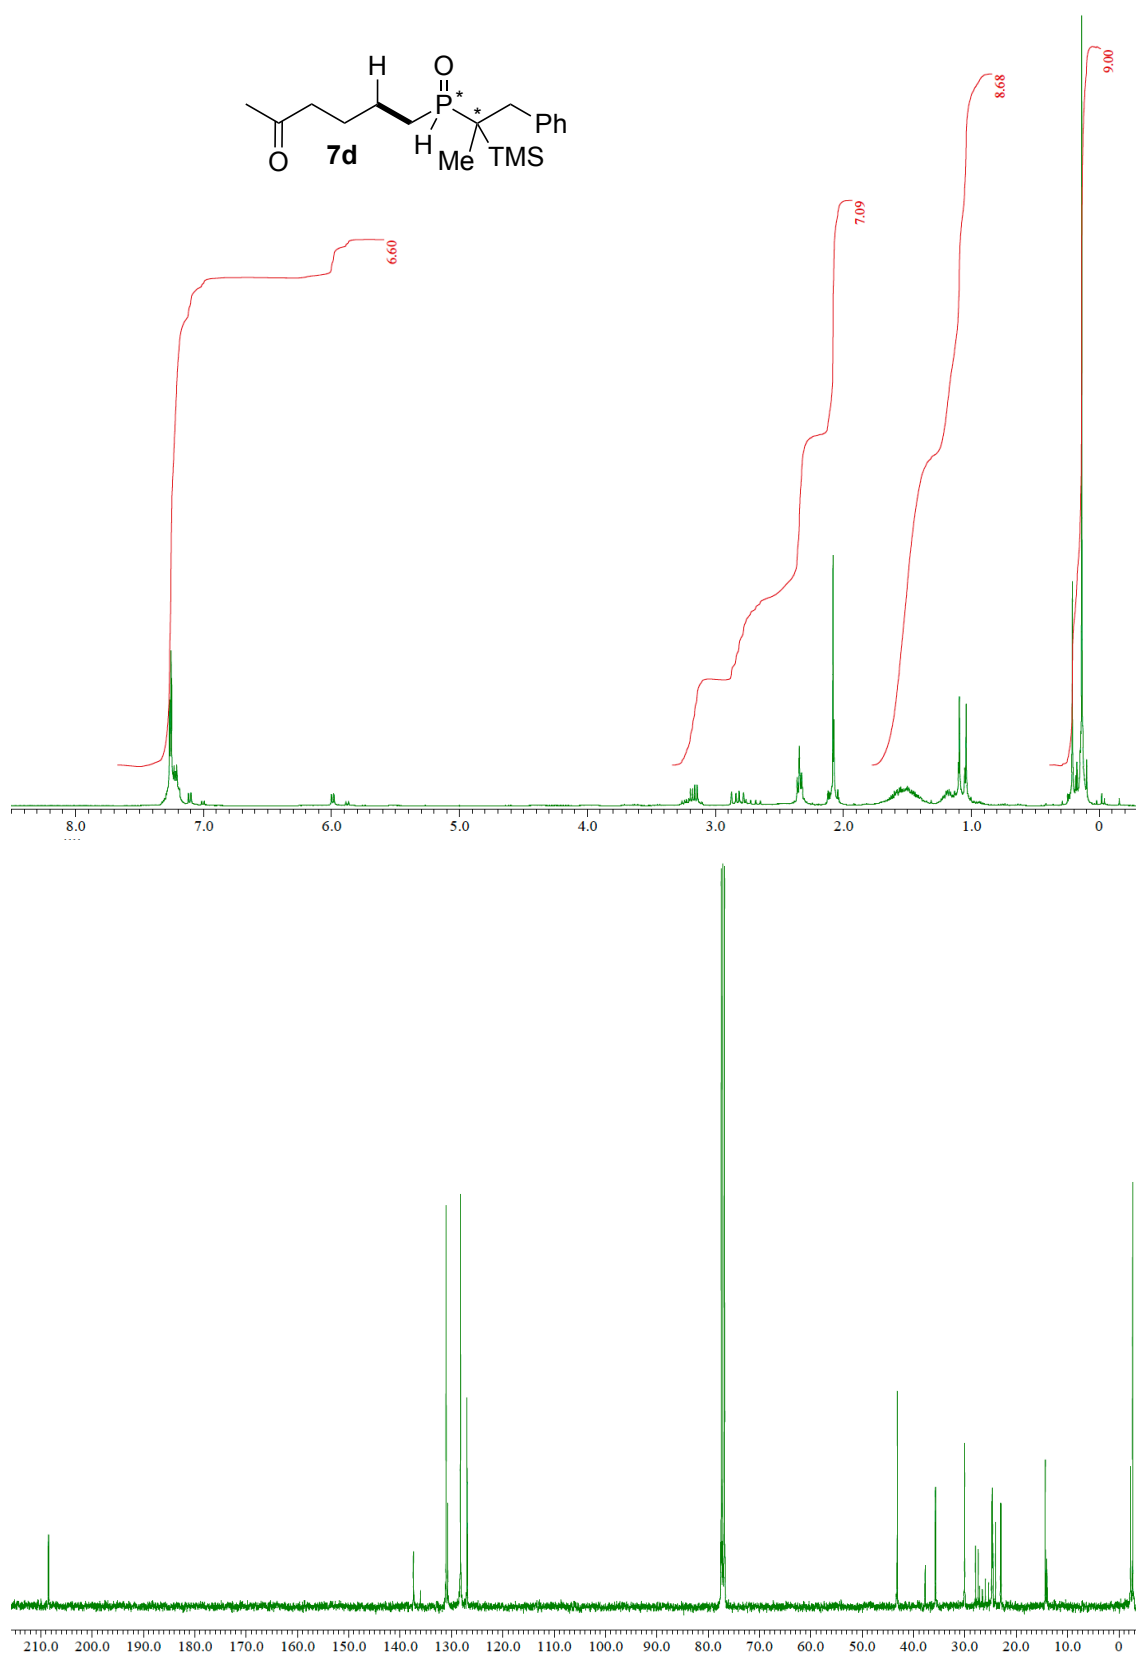

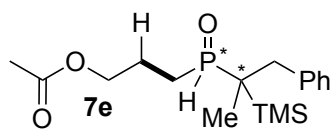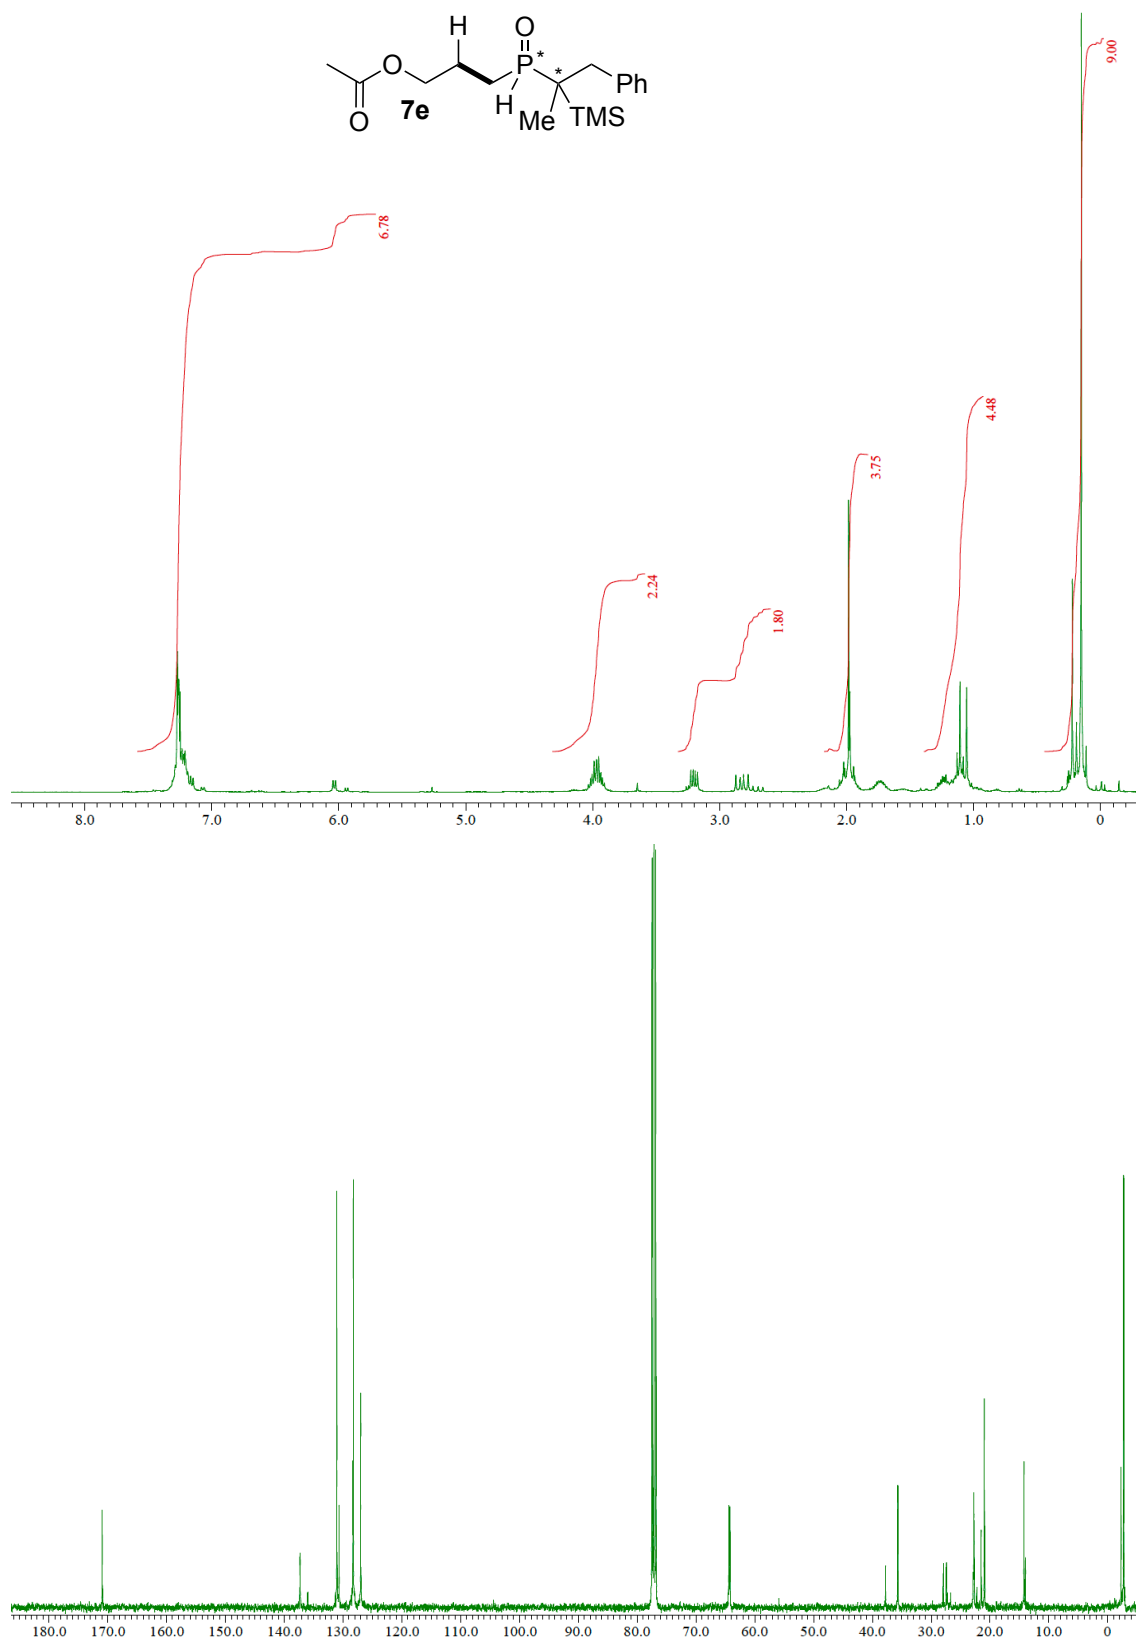

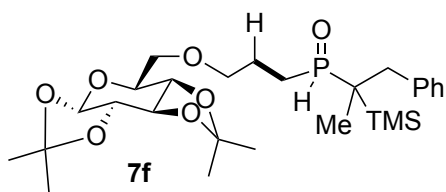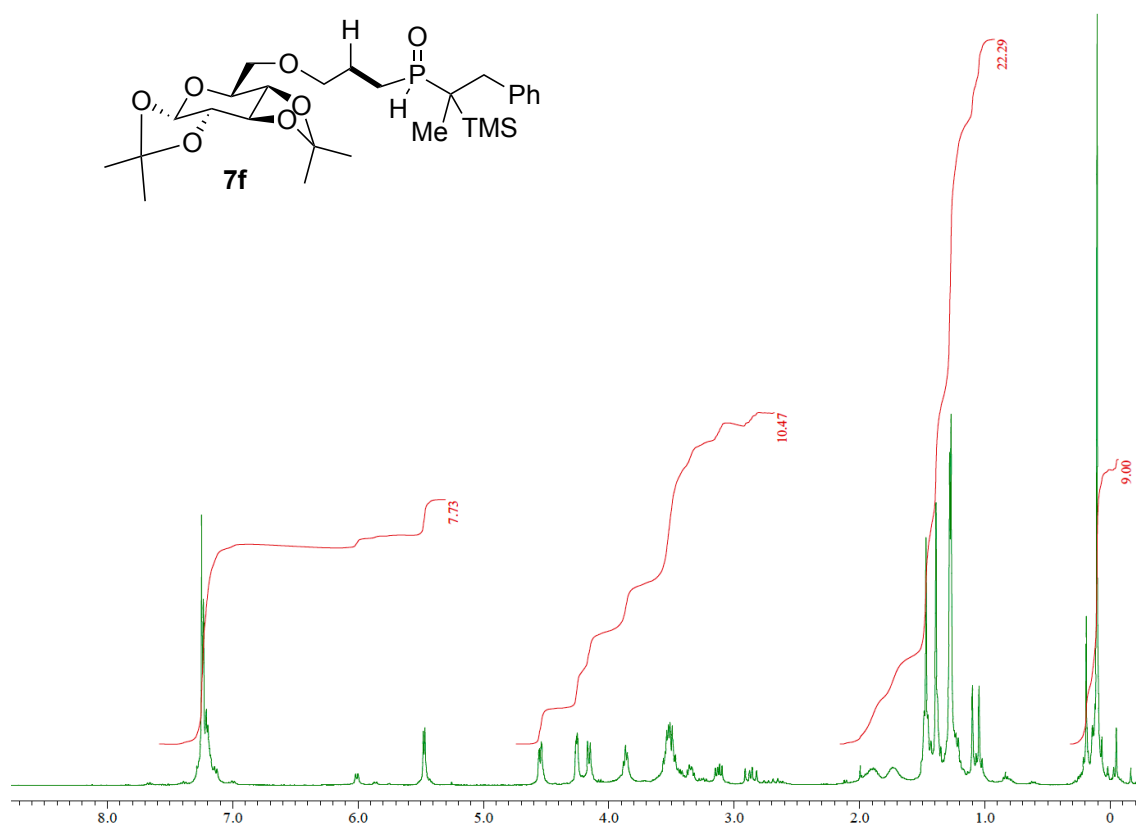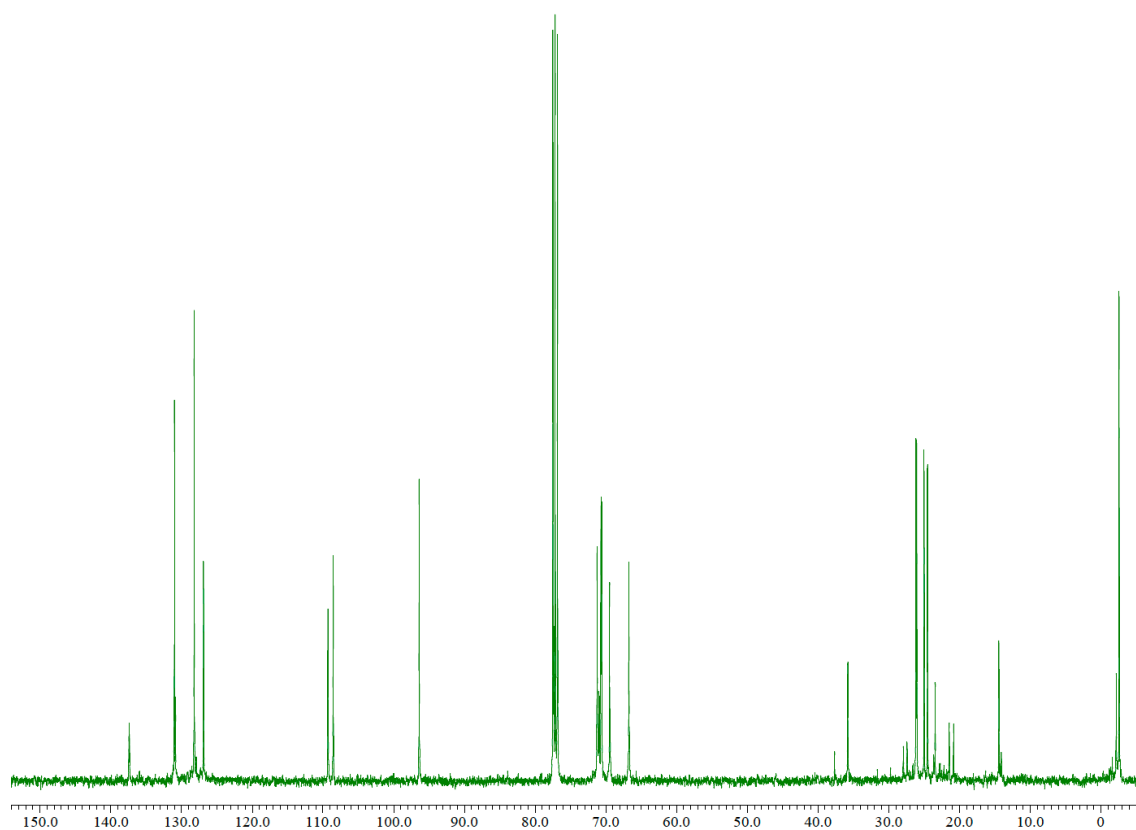

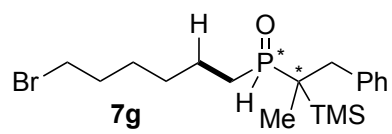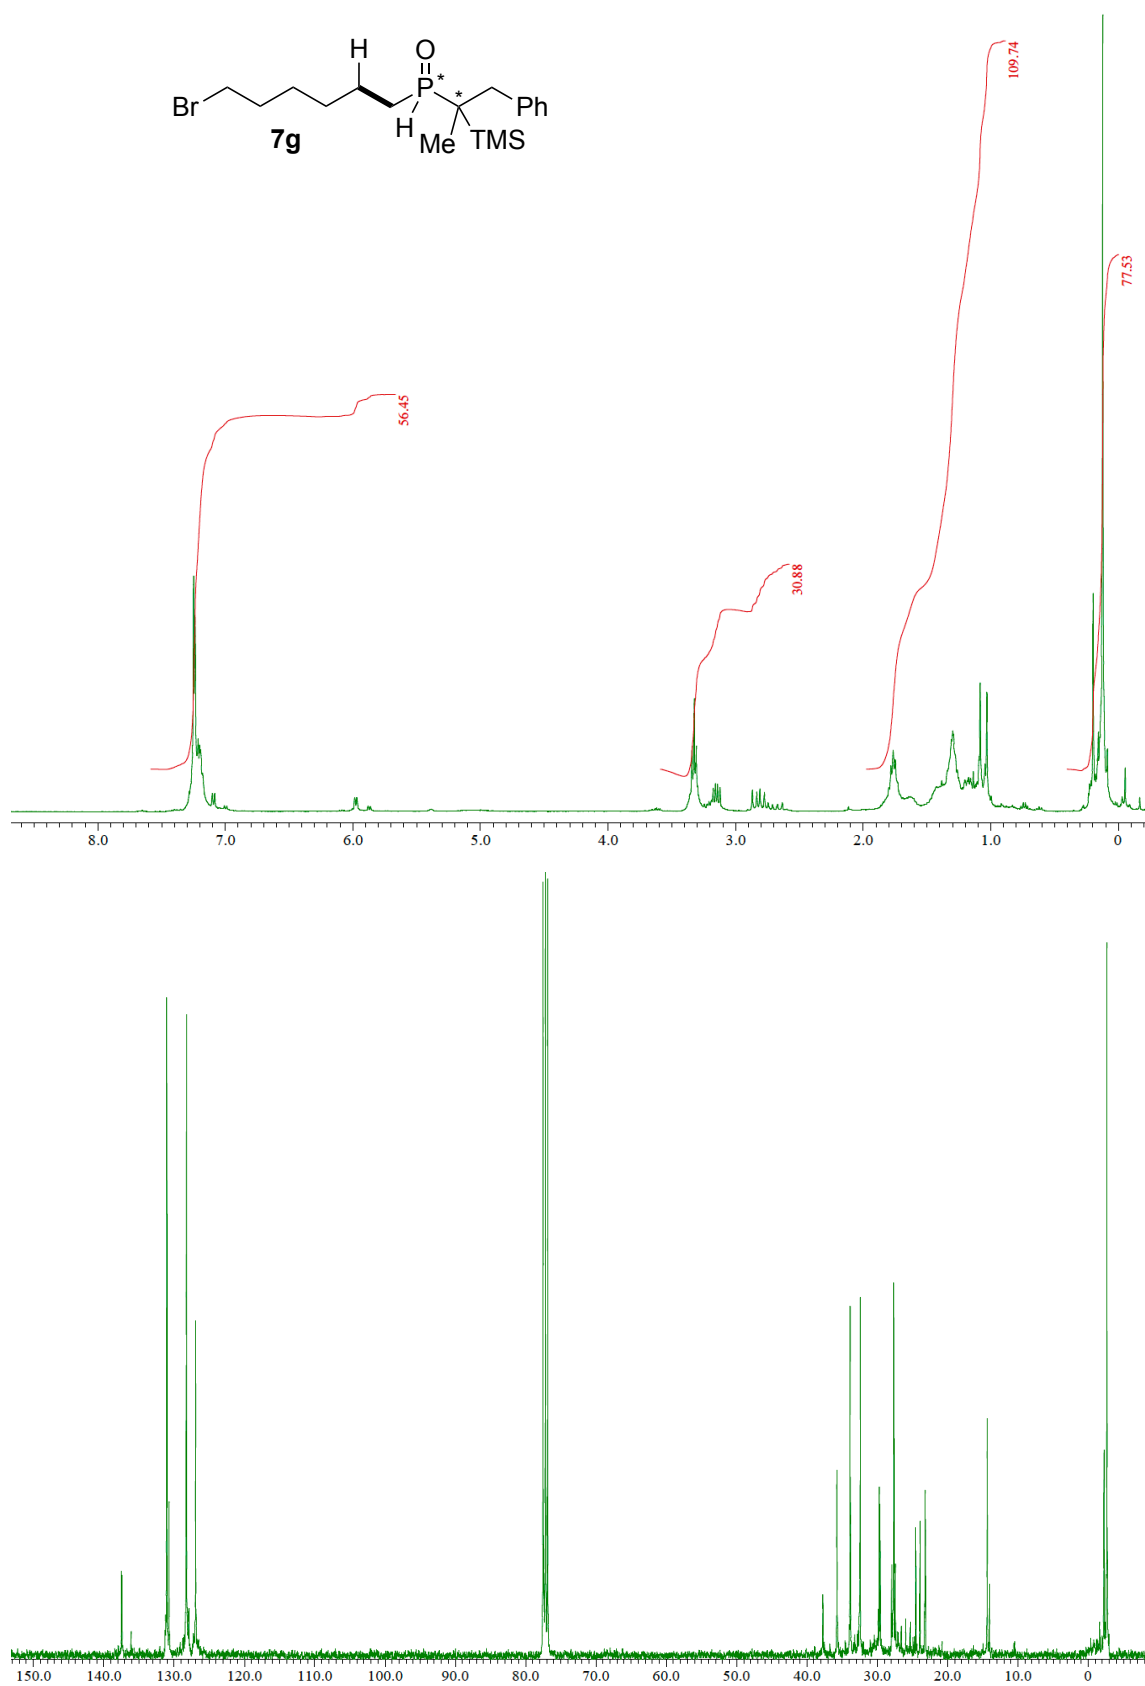

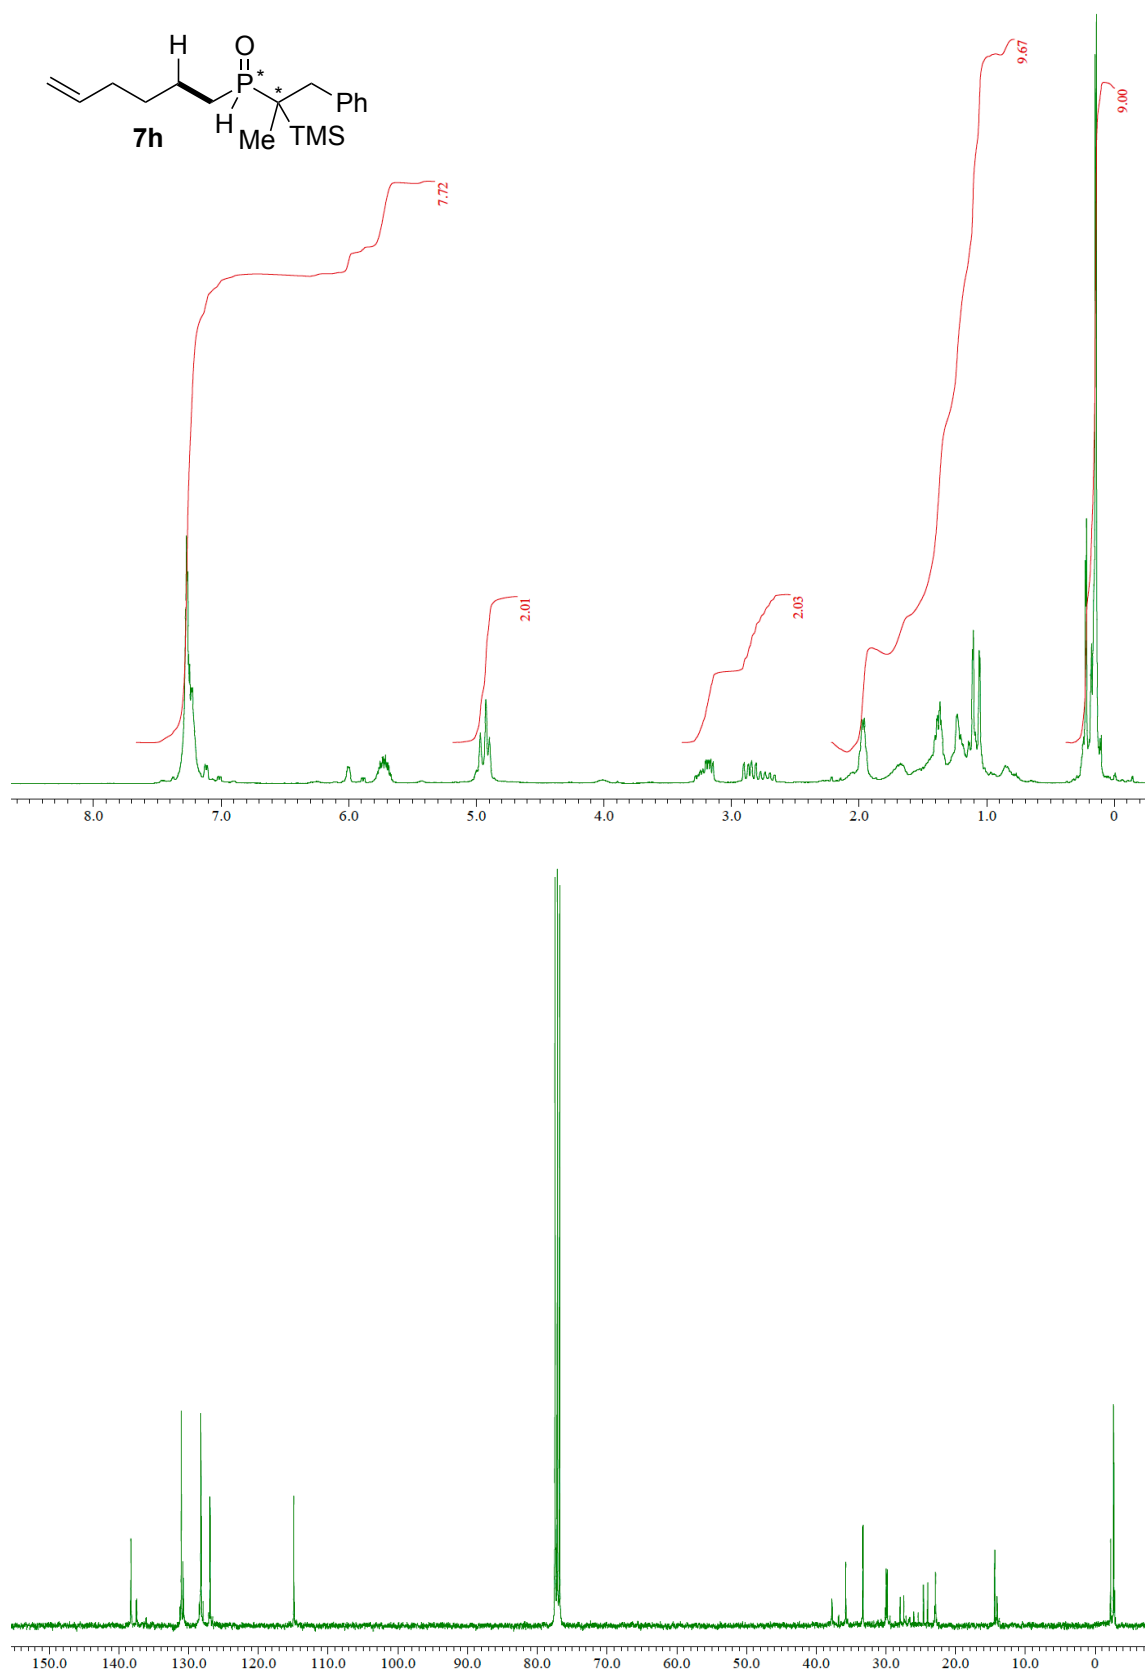

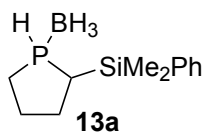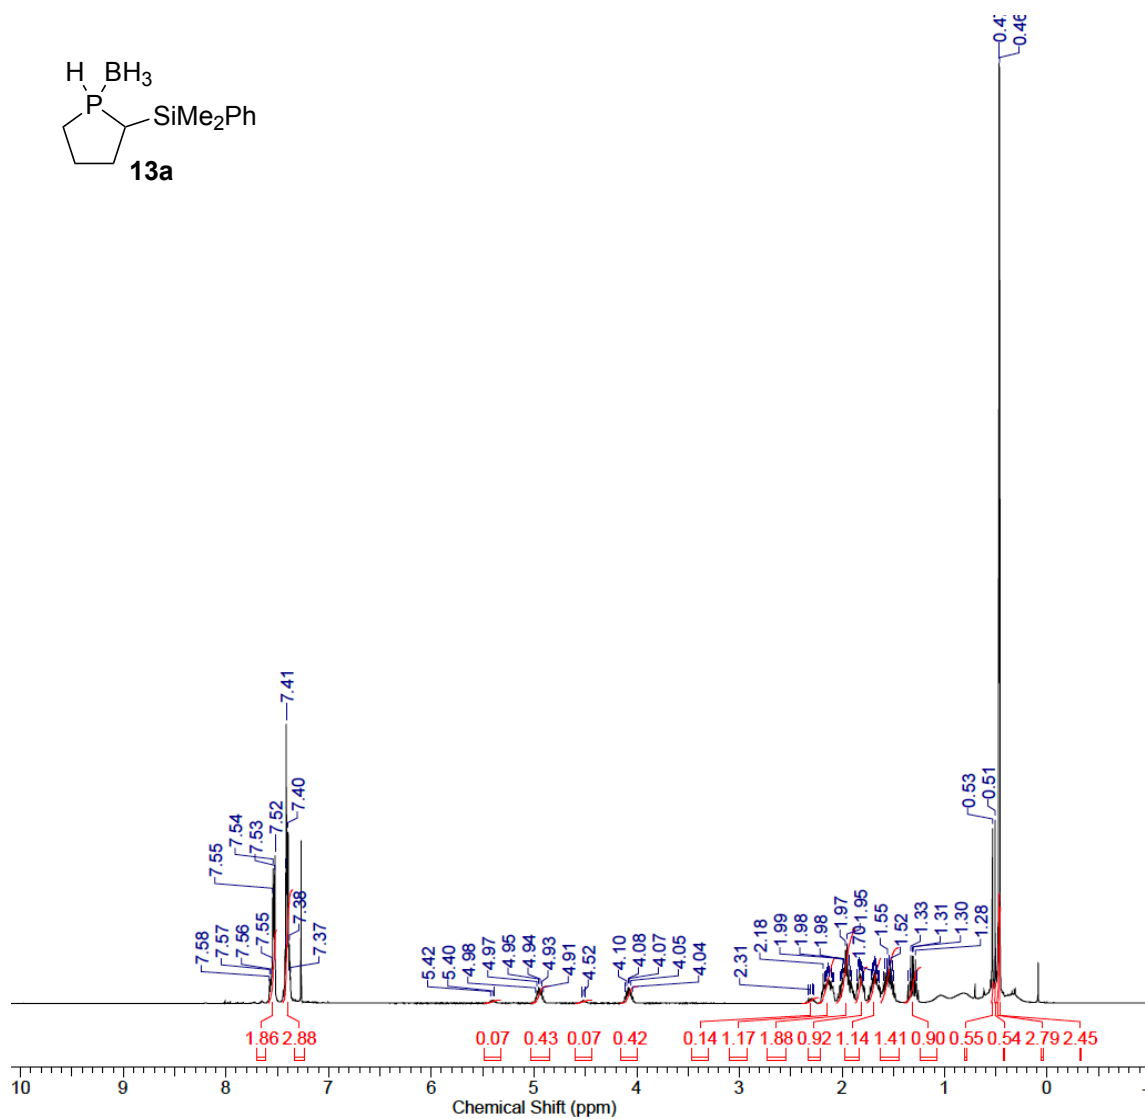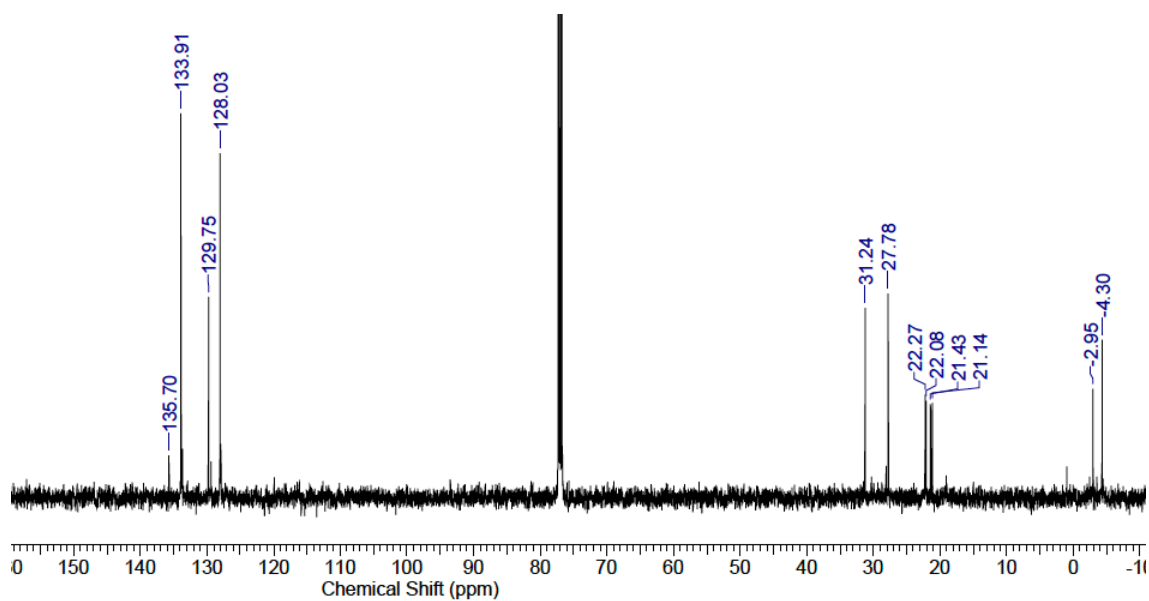

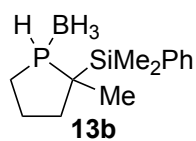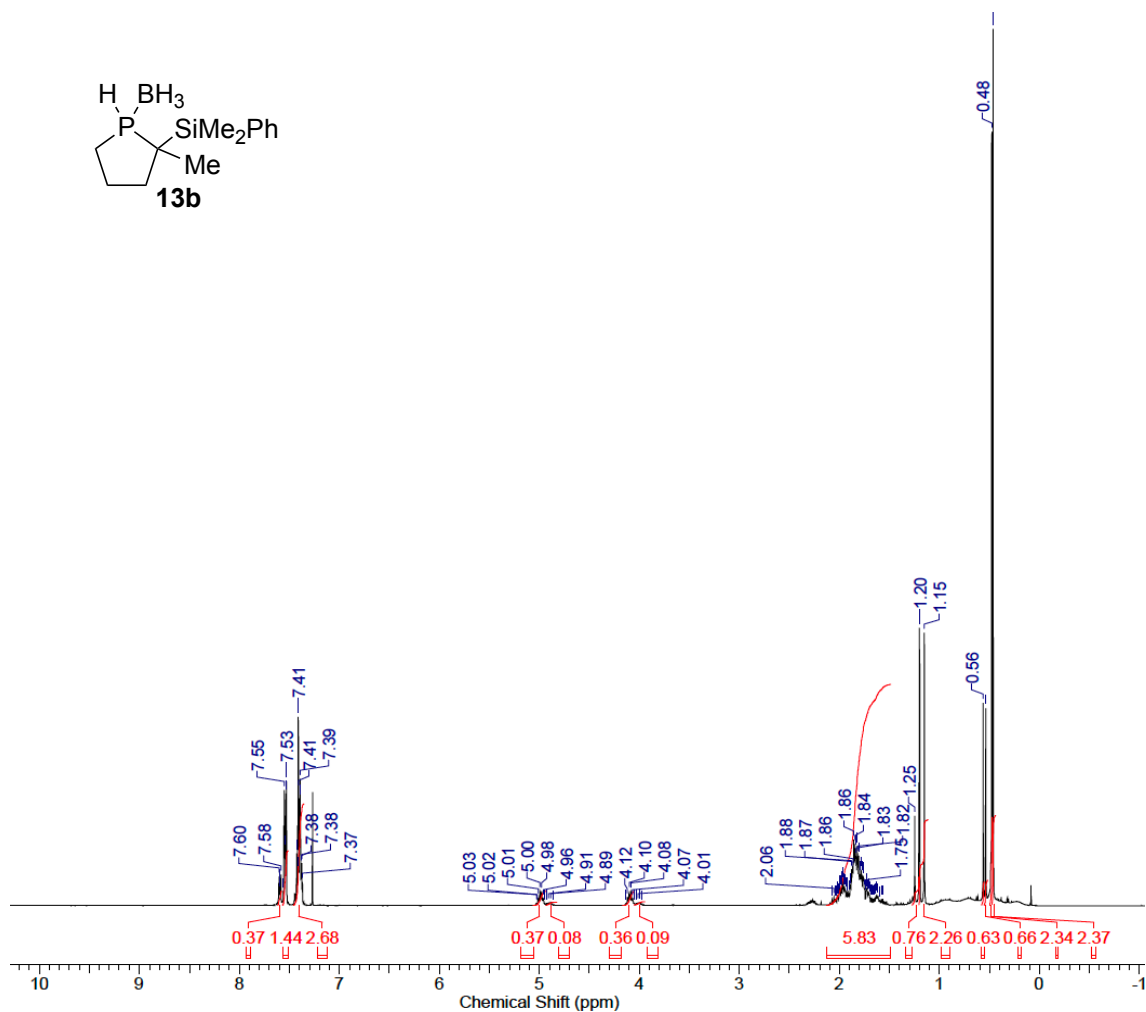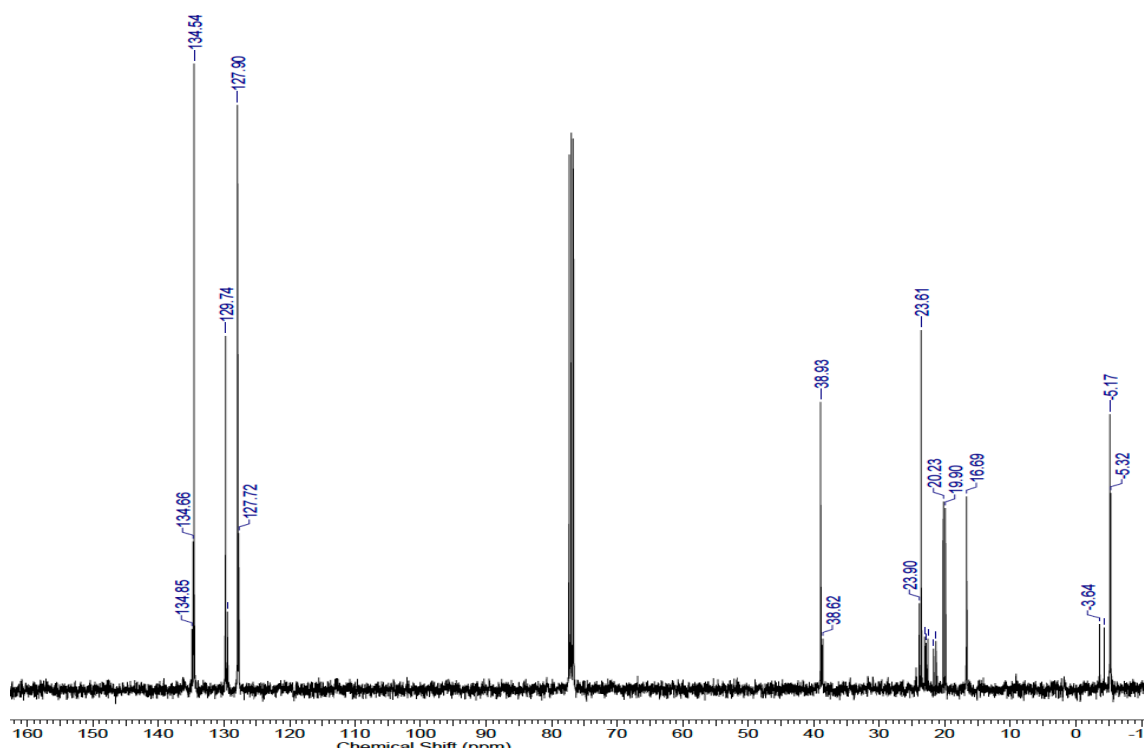

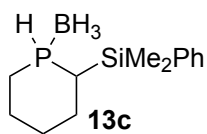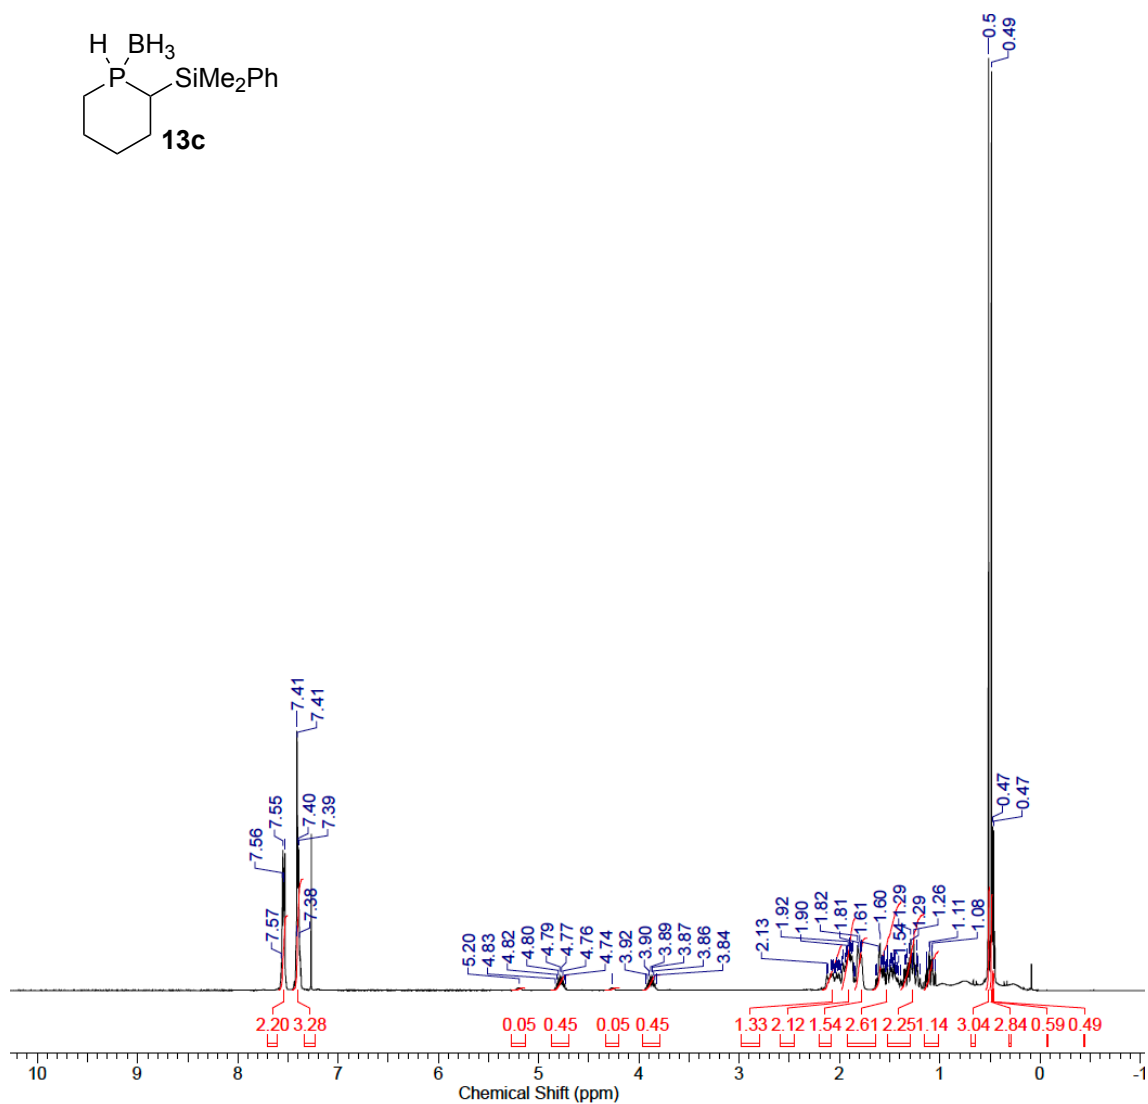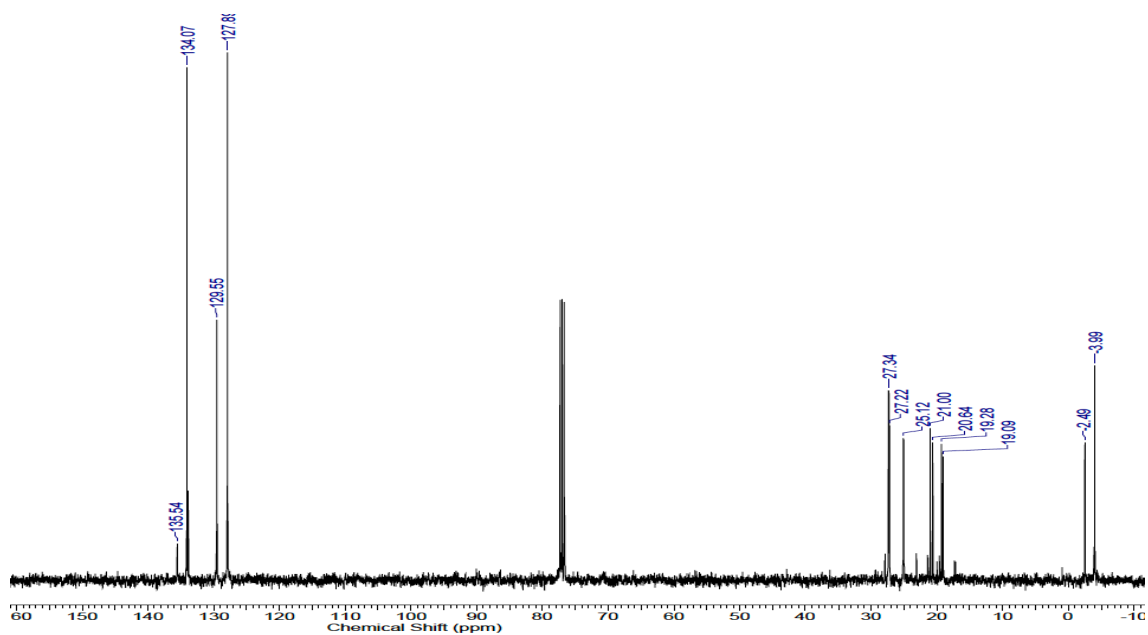



## References

1. *Henkankun-R* is software for the conversion from Dectris-PILATUS and EIGER frames to the SFRM format, and is written in C# and Python codes by Shikama, S.; Nishino, R.; Minoura, R. November, 2018, available at SPring-8.
2. Sheldrick, G. M. *Acta Crystallogr. Sect. A*, **2015**, *71*, 3.
3. Sheldrick, G. M. *Acta Crystallogr. Sect. C*, **2015**, *71*, 3.
